# Supplementary material for: Glycomic profiling of carcinoembryonic antigen isolated from human tumor tissue
Source: PubMed Central journal article supplement (PMC4495800; doi:10.1186/s12014-015-9088-3), 2015-06-27
Supplement: 12014_2015_9088_MOESM1_ESM.pdf [file 12014_2015_9088_MOESM1_ESM.pdf]

**Table 1. N-glycans harvested from CEA of colorectal carcinoma patients**

| Peak No. | Measured N-glycan Mass [M+Na] <sup>+</sup> | Theoretical N-glycan Mass [M+Na] <sup>+</sup> | N-glycan Structure                                                                    |
|----------|--------------------------------------------|-----------------------------------------------|---------------------------------------------------------------------------------------|
| 1        | 1171.423                                   | 1171.583                                      |    |
| 2        | 1345.385                                   | 1345.672                                      |    |
| 3        | 1375.377                                   | 1375.683                                      |    |
| 4        | 1416.344                                   | 1416.709                                      |    |
| 5        | 1579.327                                   | 1375.783                                      |    |
| 6        | 1620.301                                   | 1620.809                                      |    |
| 7        | 1783.241                                   | 1783.882                                      |    |
| 8        | 1794.227                                   | 1794.898                                      |    |
| 9        | 1866.002                                   | 1865.935                                      |    |
| 10       | 1824.220                                   | 1824.909                                      |    |
| 11       | 1835.216                                   | 1835.925                                      |    |
| 12       | 1906.198                                   | 1906.962                                      |    |
| 13       | 1968.199                                   | 1968.988                                      |    |
| 14       | 1987.171                                   | 1987.982                                      |    |
| 15       | 2040.180                                   | 2040.025                                      |   |
| 16       | 2070.134                                   | 2070.035                                      |  |
| 17       | 2111.098                                   | 2111.062                                      |  |
| 18       | 2143.112                                   | 2143.077                                      |  |
| 19       | 2156.094                                   | 2156.072                                      |  |
| 20       | 2192.835                                   | 2192.082                                      |  |
| 21       | 2244.094                                   | 2244.125                                      |  |
| 22       | 2285.971                                   | 2285.151                                      |  |
| 23       | 2326.249                                   | 2326.177                                      |  |
| 24       | 2330.036                                   | 2330.161                                      |  |
| 25       | 2395.988                                   | 2396.182                                      |  |
| 26       | 2401.015                                   | 2401.198                                      |  |
| 27       | 2418.229                                   | 2418.213                                      |  |
| 28       | 2431.970                                   | 2431.209                                      |  |
| 29       | 2489.912                                   | 2489.251                                      |  |
| 30       | 2530.337                                   | 2530.277                                      |  |
| 31       | 2562.967                                   | 2562.292                                      |  |
| 32       | 2605.951                                   | 2605.198                                      |  |
| 33       | 2693.430                                   | 2693.350                                      |  |
| 34       | 2734.467                                   | 2734.377                                      |  |
| 35       | 2779.723                                   | 2779.387                                      |  |
| 36       | 2792.865                                   | 2792.383                                      |  |

| Peak No. | Measured N-glycan Mass [M+Na] <sup>+</sup> | Theoretical N-glycan Mass [M+Na] <sup>+</sup> | N-glycan Structure                                                                    |
|----------|--------------------------------------------|-----------------------------------------------|---------------------------------------------------------------------------------------|
| 37       | 2850.648                                   | 2850.424                                      |    |
| 38       | 2880.636                                   | 2880.435                                      |    |
| 39       | 2938.584                                   | 2938.476                                      |    |
| 40       | 2953.589                                   | 2953.477                                      |    |
| 41       | 2966.593                                   | 2966.472                                      |    |
| 42       | 3024.570                                   | 3024.514                                      |    |
| 43       | 3054.565                                   | 3054.524                                      |    |
| 44       | 3142.495                                   | 3142.577                                      |    |
| 45       | 3211.478                                   | 3211.598                                      |    |
| 46       | 3228.435                                   | 3228.613                                      |    |
| 47       | 3316.398                                   | 3316.666                                      |    |
| 48       | 3329.360                                   | 3329.661                                      |    |
| 49       | 3387.316                                   | 3387.703                                      |    |
| 50       | 3402.338                                   | 3402.703                                      |  |
| 51       | 3415.282                                   | 3415.698                                      |  |
| 52       | 3562.432                                   | 3561.792                                      |  |
| 53       | 3576.243                                   | 3576.792                                      |  |
| 54       | 3677.112                                   | 3677.280                                      |  |
| 55       | 3851.036                                   | 3851.929                                      |  |
| 56       | 4027.004                                   | 4026.018                                      |  |
| 57       | 4213.011                                   | 4213.102                                      |  |
| 58       | 4387.109                                   | 4387.192                                      |  |
| 59       | 4561.164                                   | 4561.281                                      |  |
| 60       | 4748.251                                   | 4748.365                                      |  |
| 61       | 4922.237                                   | 4922.455                                      |  |
