# Supplementary material for: Glycomic profiling of carcinoembryonic antigen isolated from human tumor tissue
Source: PubMed Central journal article supplement (PMC4495800; doi:10.1186/s12014-015-9088-3), 2015-06-27
Supplement: 12014_2015_9088_MOESM2_ESM.pdf [file 12014_2015_9088_MOESM2_ESM.pdf]

# Supporting Information

## Glycomic Profiling of Carcinoembryonic Antigen Isolated from Human Tumor Tissue

Chuncui Huang<sup>1</sup>, ([huangchuncui111@163.com](mailto:huangchuncui111@163.com))

Tiancheng Zhan<sup>2</sup>, ([jessecrash@sina.com](mailto:jessecrash@sina.com))

Yaming Liu<sup>1</sup>, ([lymzzu2009@163.com](mailto:lymzzu2009@163.com))

Qianqian Li<sup>1</sup>, ([liqianqian.2006@163.com](mailto:liqianqian.2006@163.com))

Hongmei Wu<sup>1</sup>, ([wuhongmei@moon.ibp.ac.cn](mailto:wuhongmei@moon.ibp.ac.cn))

Dengbo Ji<sup>2</sup>, ([jidengbo@bjmu.edu.cn](mailto:jidengbo@bjmu.edu.cn))

Yan Li<sup>1</sup>,\* Correspondence: ([yanli@ibp.ac.cn](mailto:yanli@ibp.ac.cn))

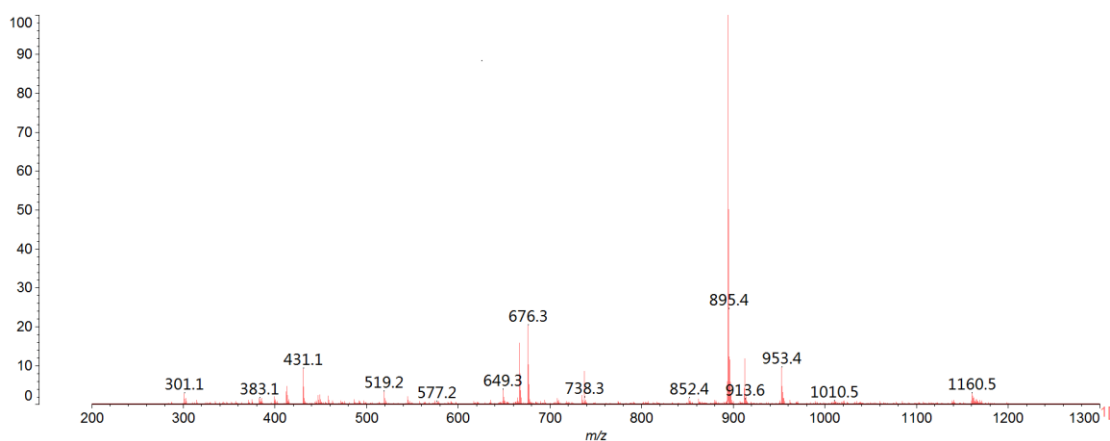

Figure S1, MALDI-TOF/TOF fragment ion spectra of the parent ions at  $m/z$  1171

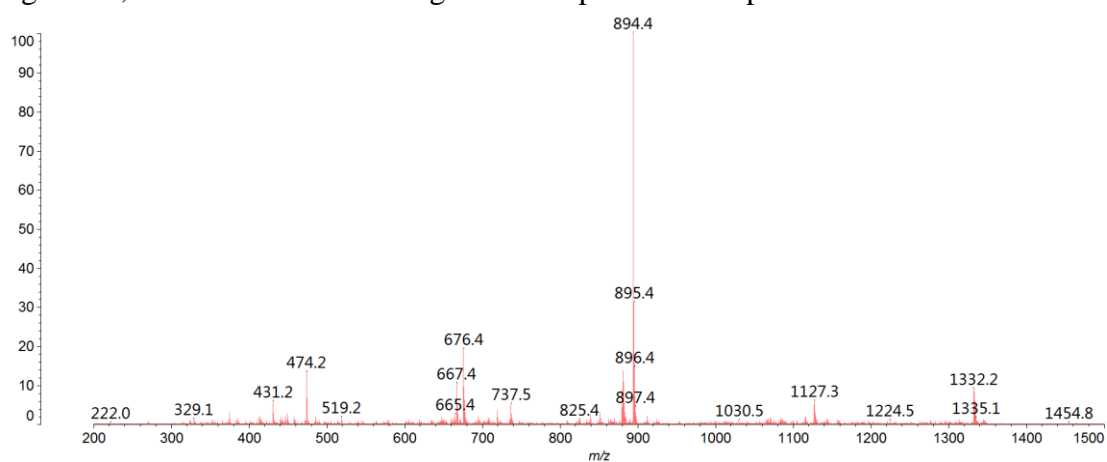

Figure S2, MALDI-TOF/TOF fragment ion spectra of the parent ions at  $m/z$  1345

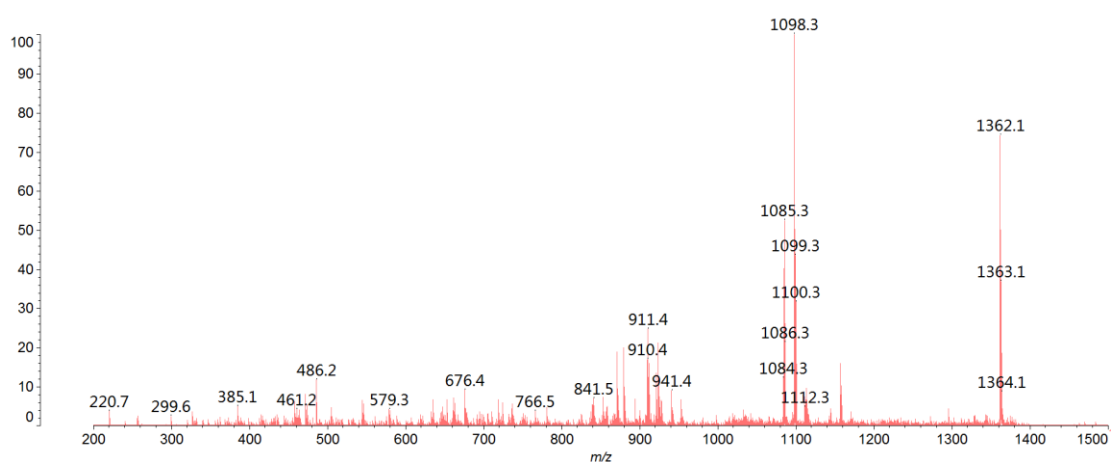

Figure S3, MALDI-TOF/TOF fragment ion spectra of the parent ions at  $m/z$  1375

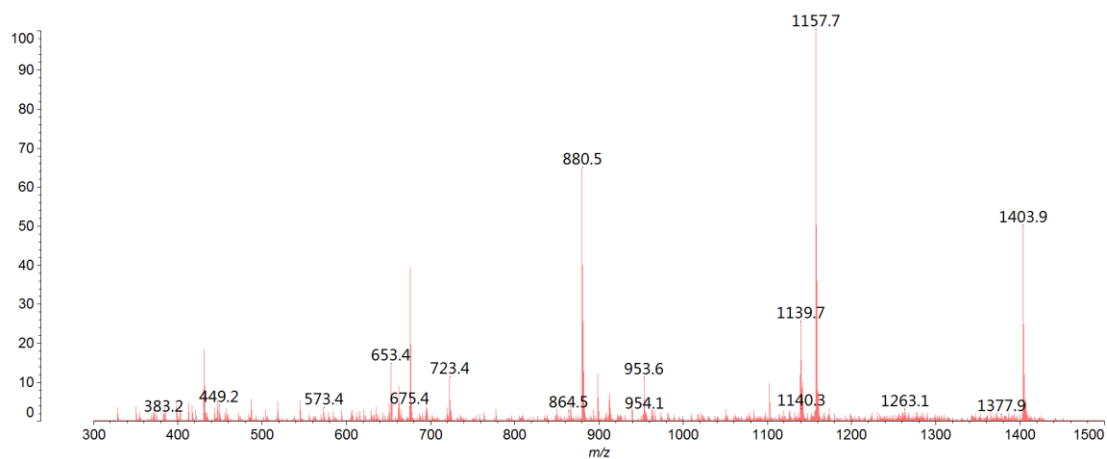

Figure S4, MALDI-TOF/TOF fragment ion spectra of the parent ions at  $m/z$  1416

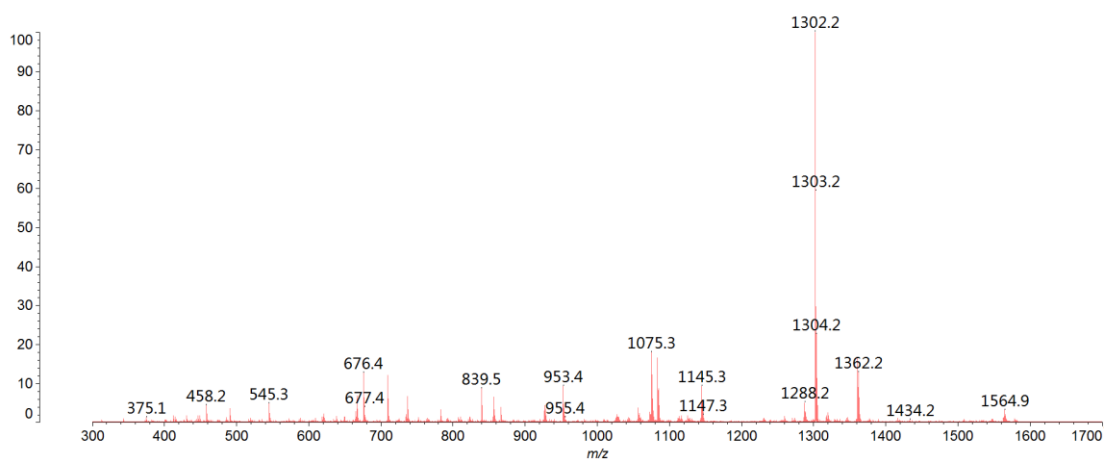

Figure S5, MALDI-TOF/TOF fragment ion spectra of the parent ions at  $m/z$  1579

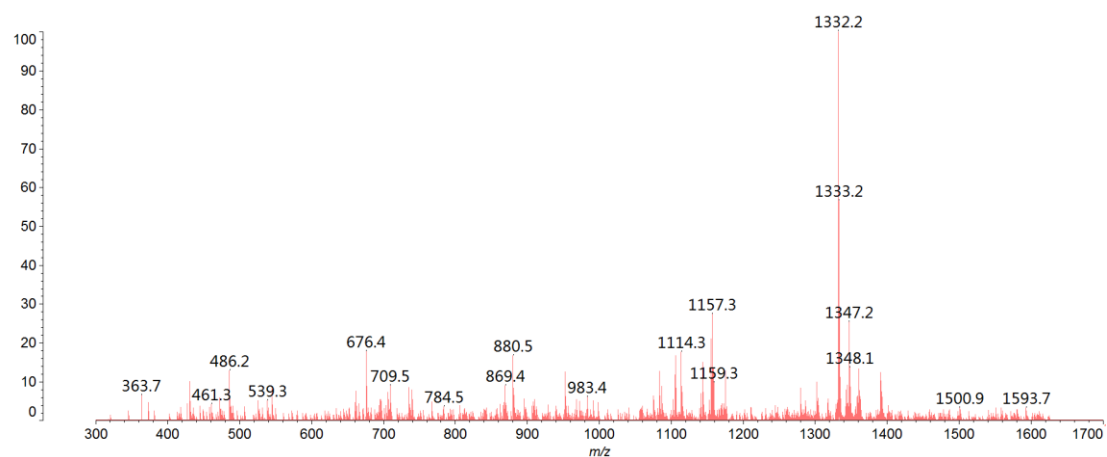

Figure S6, MALDI-TOF/TOF fragment ion spectra of the parent ions at  $m/z$  1620

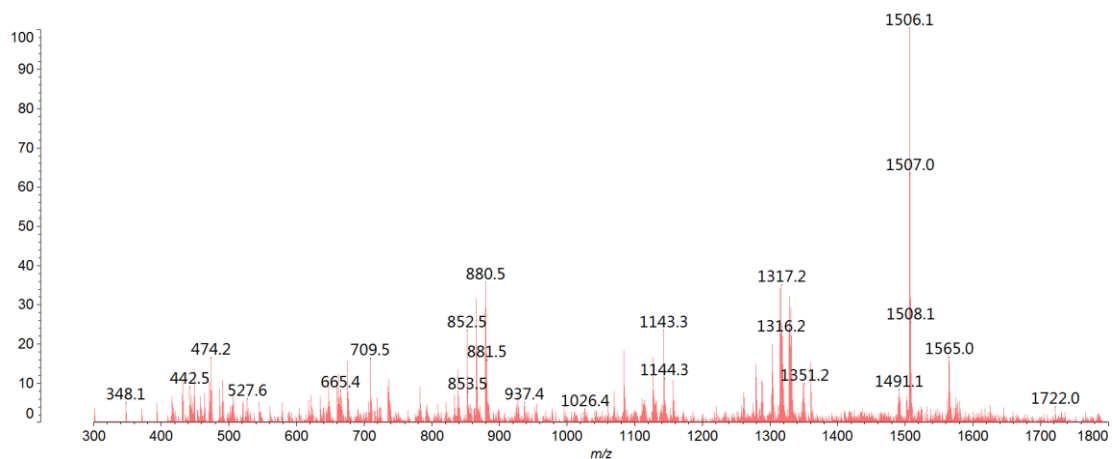

Figure S7, MALDI-TOF/TOF fragment ion spectra of the parent ions at  $m/z$  1783

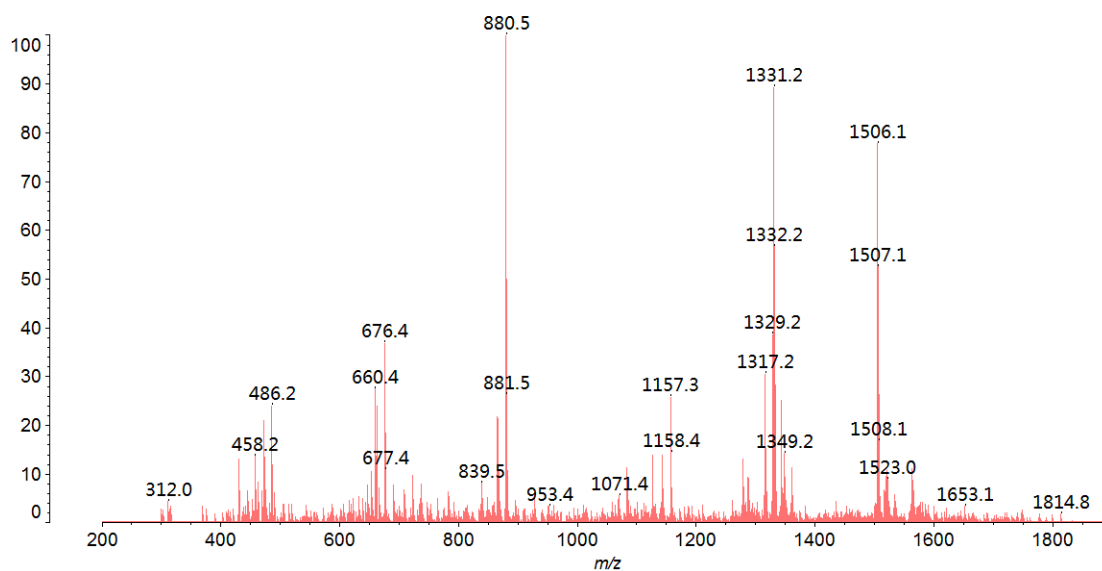

Figure S8, MALDI-TOF/TOF fragment ion spectra of the parent ions at  $m/z$  1794

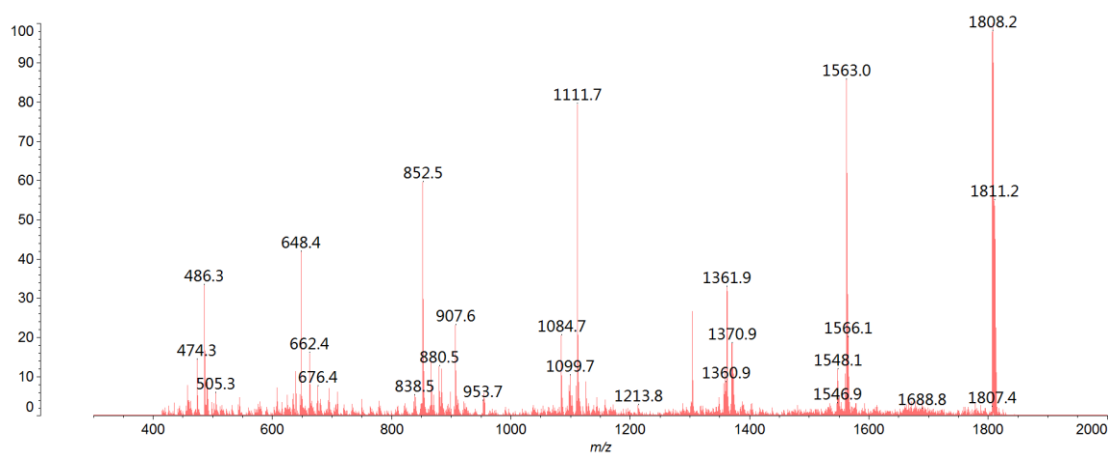

Figure S9, MALDI-TOF/TOF fragment ion spectra of the parent ions at  $m/z$  1824

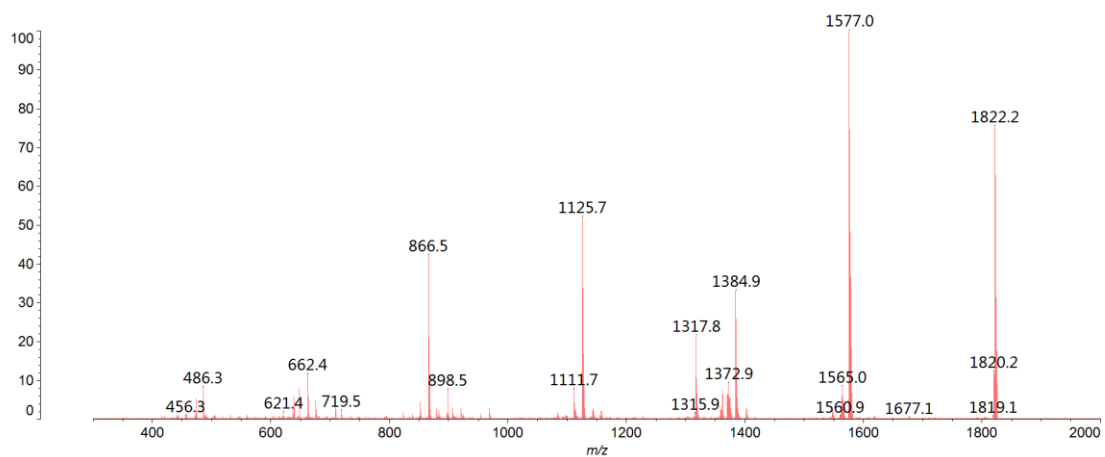

Figure S10, MALDI-TOF/TOF fragment ion spectra of the parent ions at m/z 1835

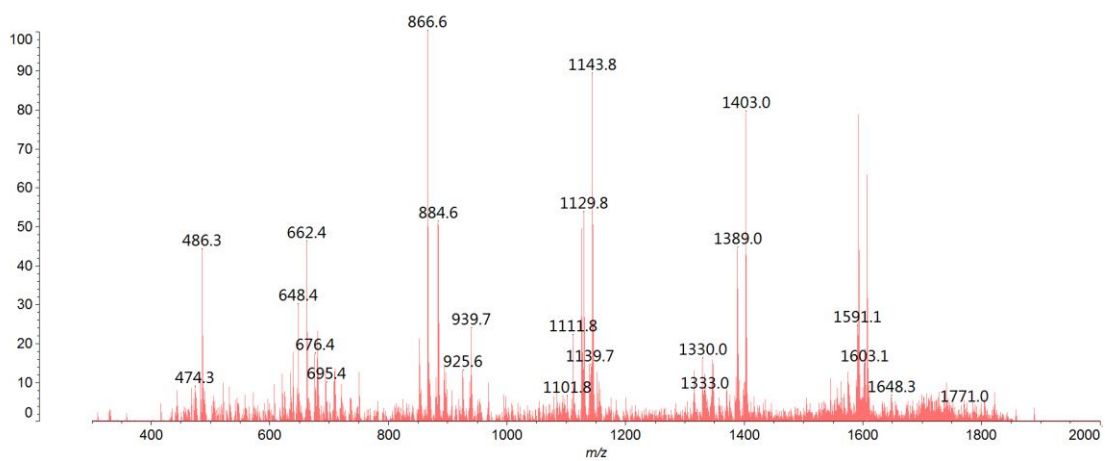

Figure S11, MALDI-TOF/TOF fragment ion spectra of the parent ions at m/z 1866

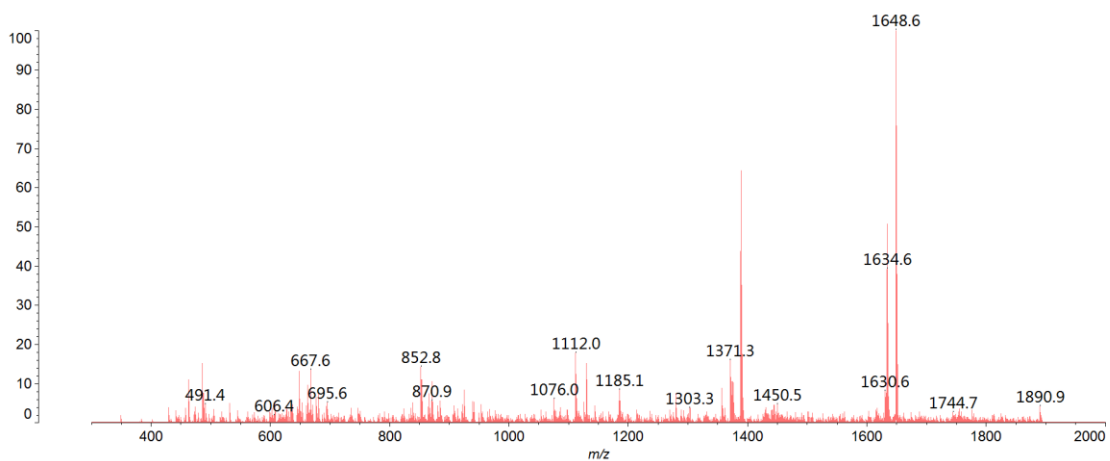

Figure S12, MALDI-TOF/TOF fragment ion spectra of the parent ions at m/z 1906

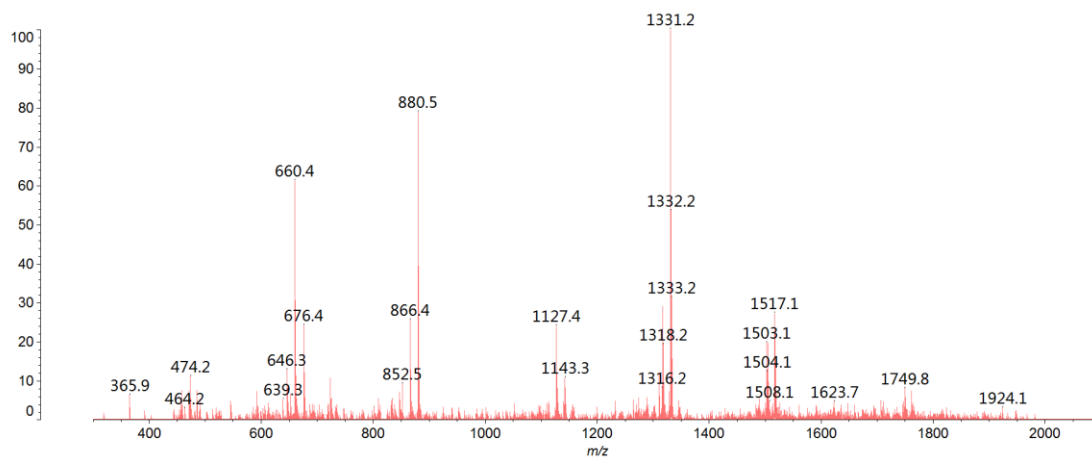

Figure S13, MALDI-TOF/TOF fragment ion spectra of the parent ions at m/z 1968

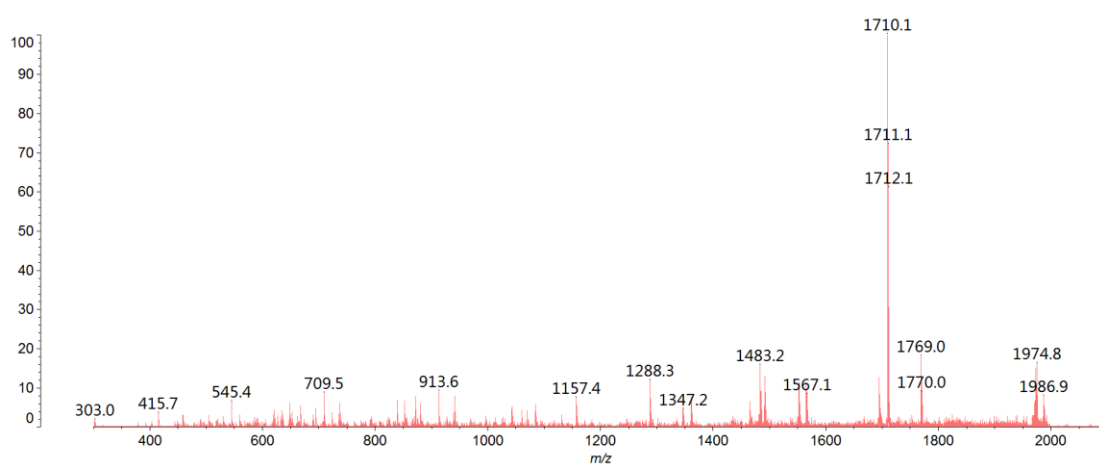

Figure S14, MALDI-TOF/TOF fragment ion spectra of the parent ions at m/z 1987

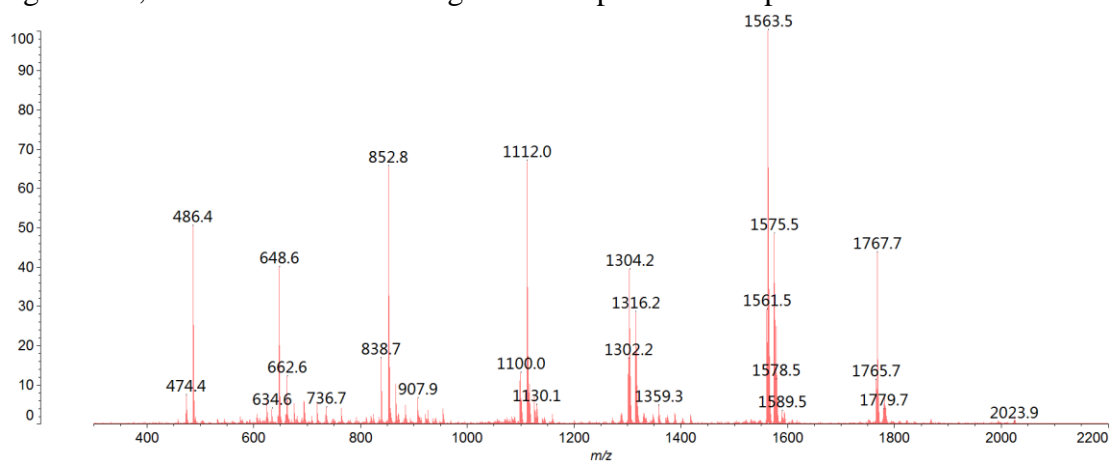

Figure S15, MALDI-TOF/TOF fragment ion spectra of the parent ions at m/z 2040

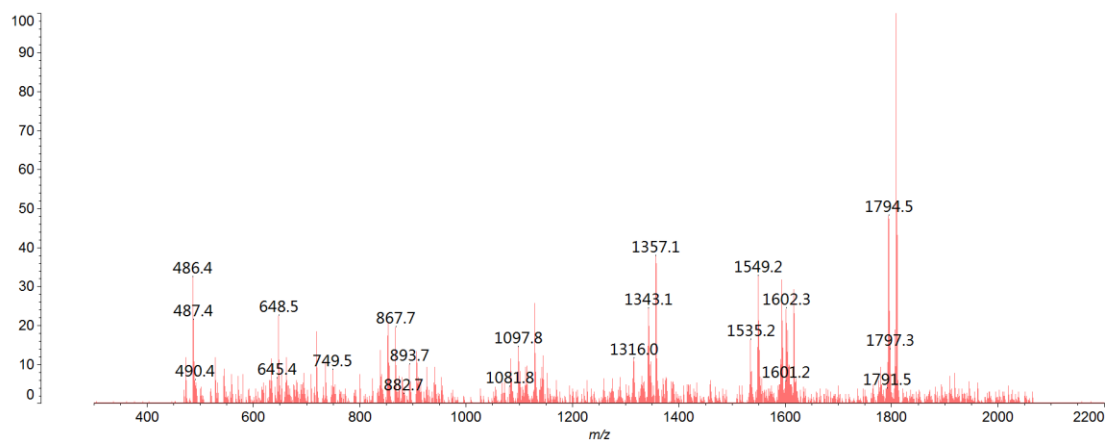

Figure S16, MALDI-TOF/TOF fragment ion spectra of the parent ions at m/z 2070

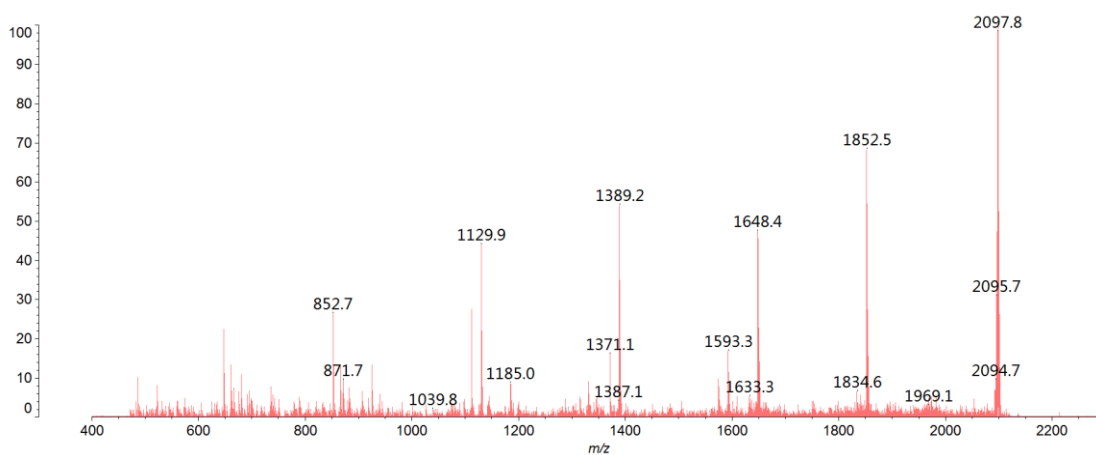

Figure S17, MALDI-TOF/TOF fragment ion spectra of the parent ions at m/z 2111

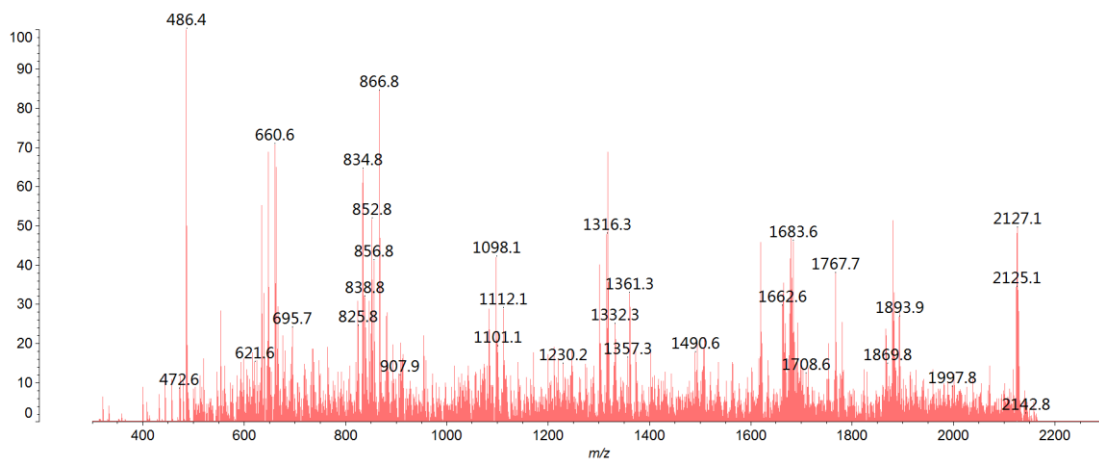

Figure S18, MALDI-TOF/TOF fragment ion spectra of the parent ions at m/z 2143

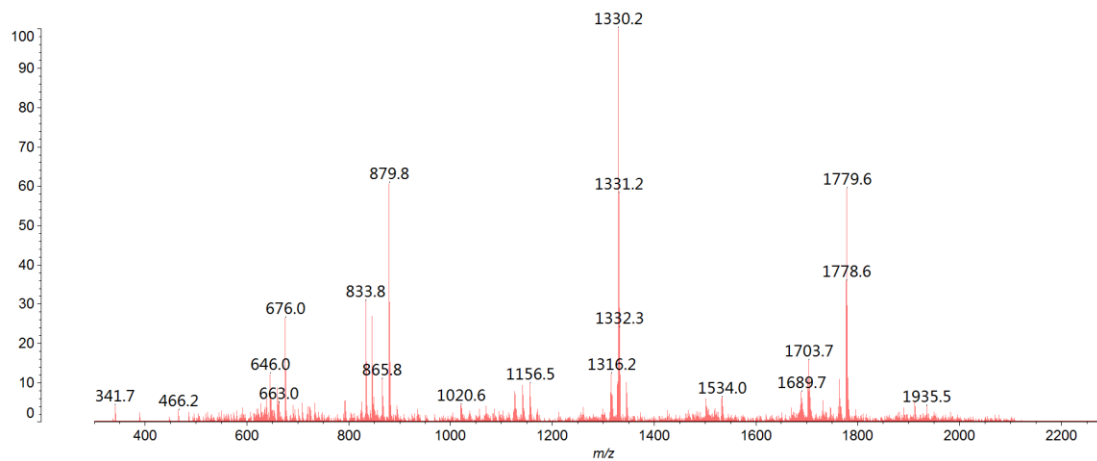

Figure S19, MALDI-TOF/TOF fragment ion spectra of the parent ions at m/z 2156

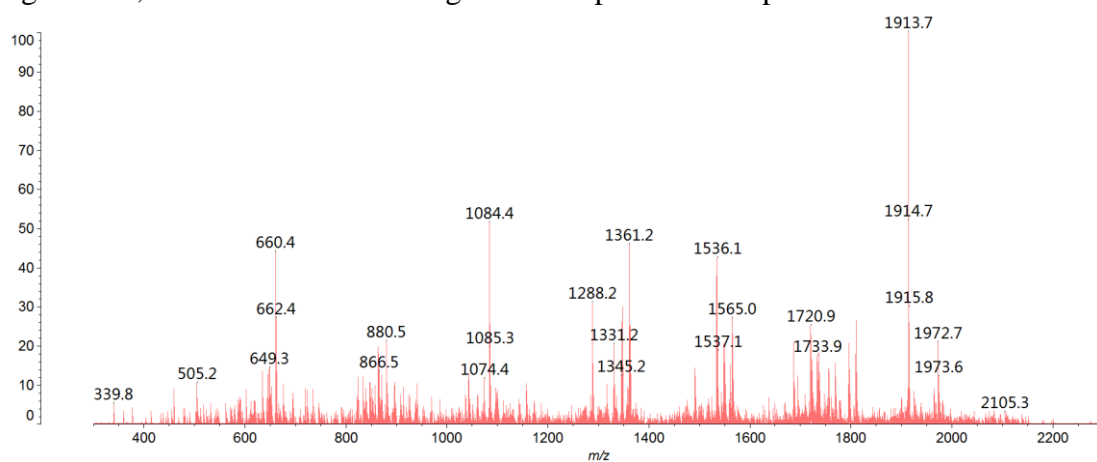

Figure S20, MALDI-TOF/TOF fragment ion spectra of the parent ions at m/z 2192

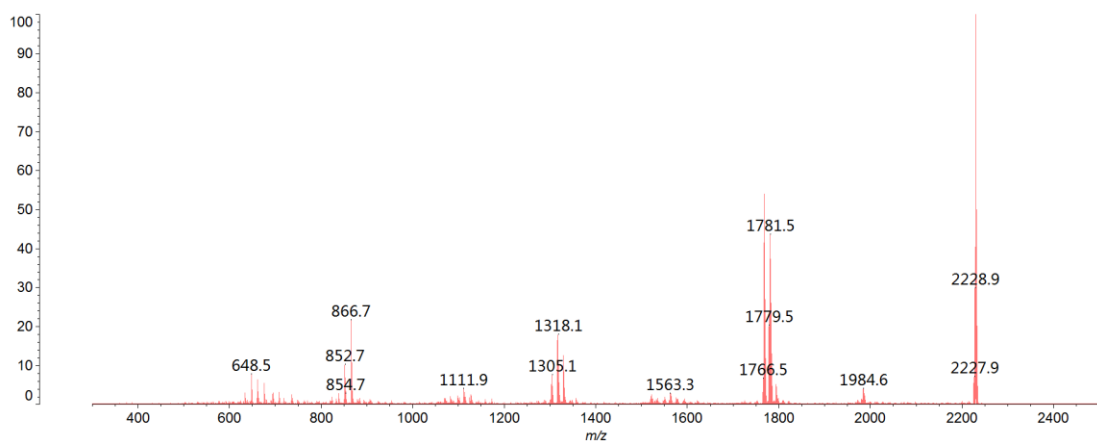

Figure S21, MALDI-TOF/TOF fragment ion spectra of the parent ions at m/z 2244



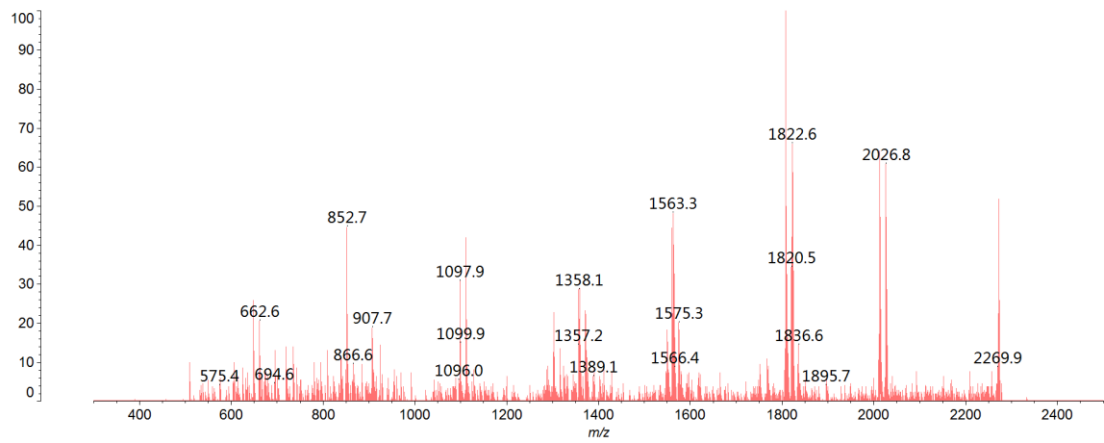

Figure S22, MALDI-TOF/TOF fragment ion spectra of the parent ions at  $m/z$  2285

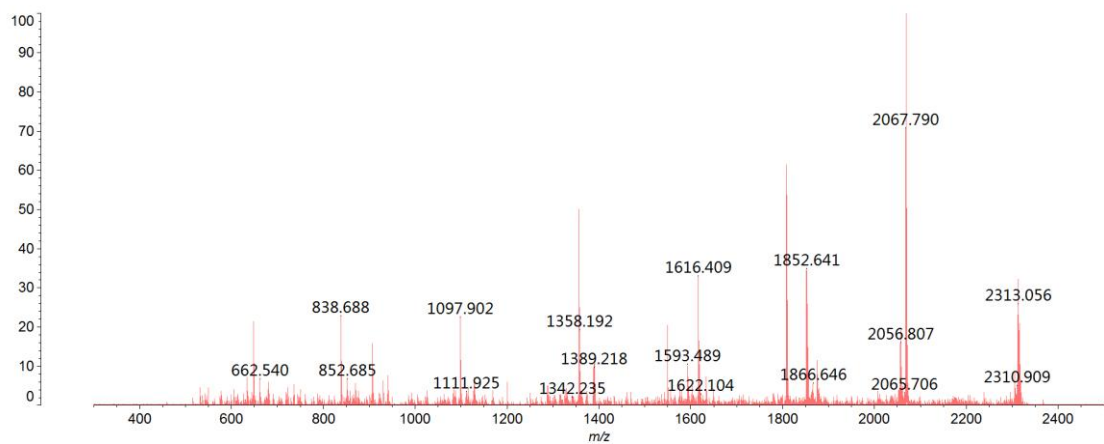

Figure S23, MALDI-TOF/TOF fragment ion spectra of the parent ions at  $m/z$  2326

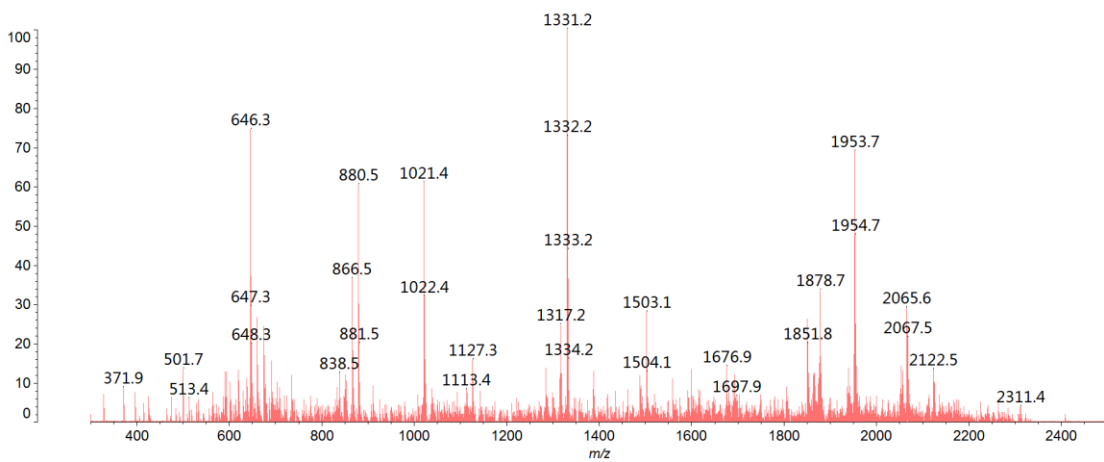

Figure S24, MALDI-TOF/TOF fragment ion spectra of the parent ions at  $m/z$  2330

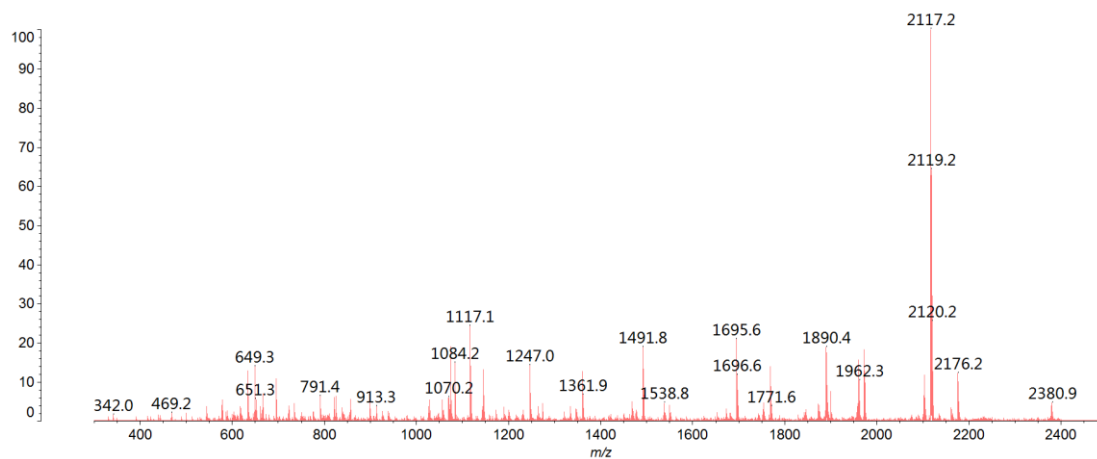

Figure S25, MALDI-TOF/TOF fragment ion spectra of the parent ions at m/z 2395

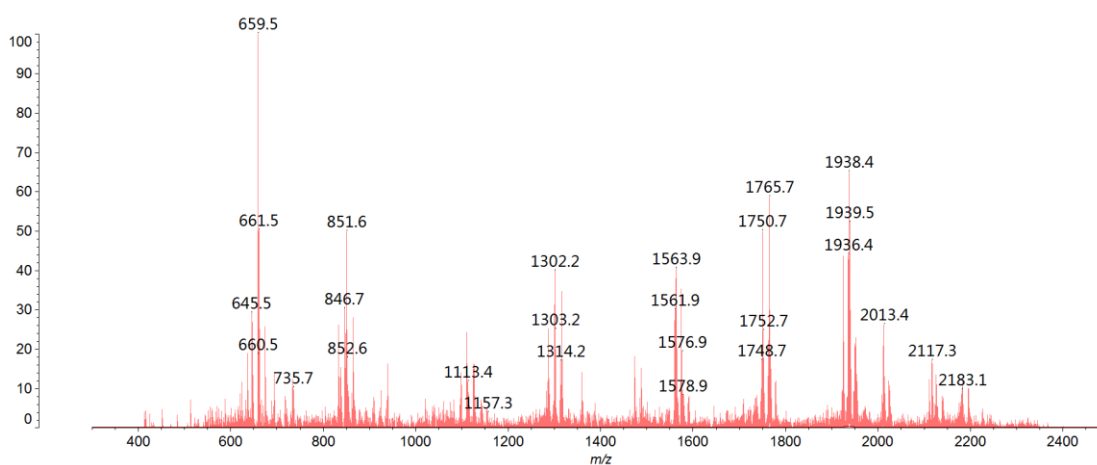

Figure S26, MALDI-TOF/TOF fragment ion spectra of the parent ions at m/z 2401

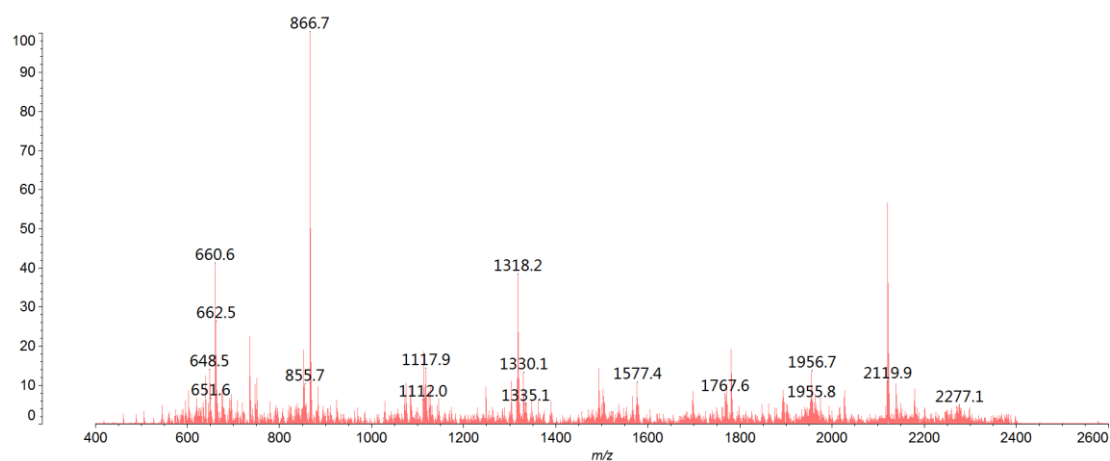

Figure S27, MALDI-TOF/TOF fragment ion spectra of the parent ions at m/z 2418

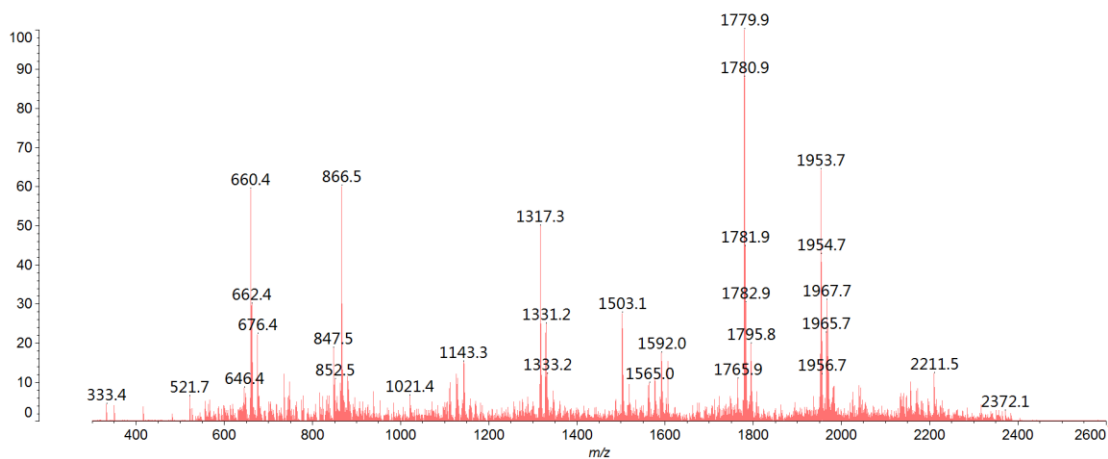

Figure S28, MALDI-TOF/TOF fragment ion spectra of the parent ions at  $m/z$  2431

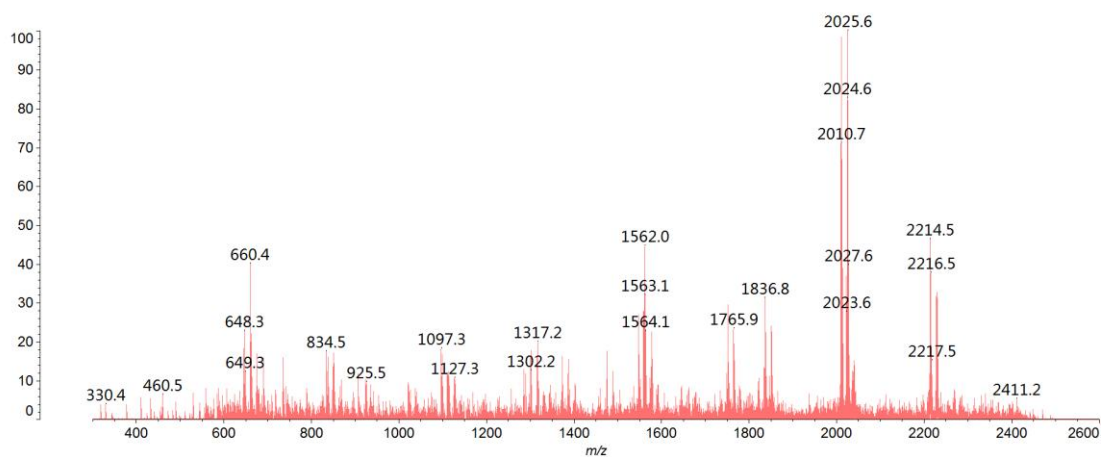

Figure S29, MALDI-TOF/TOF fragment ion spectra of the parent ions at  $m/z$  2489

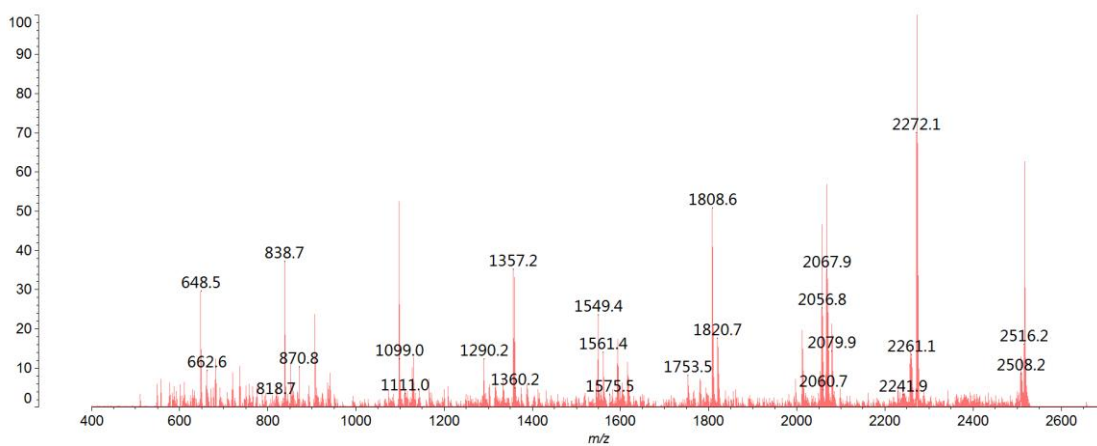

Figure S30, MALDI-TOF/TOF fragment ion spectra of the parent ions at  $m/z$  2530

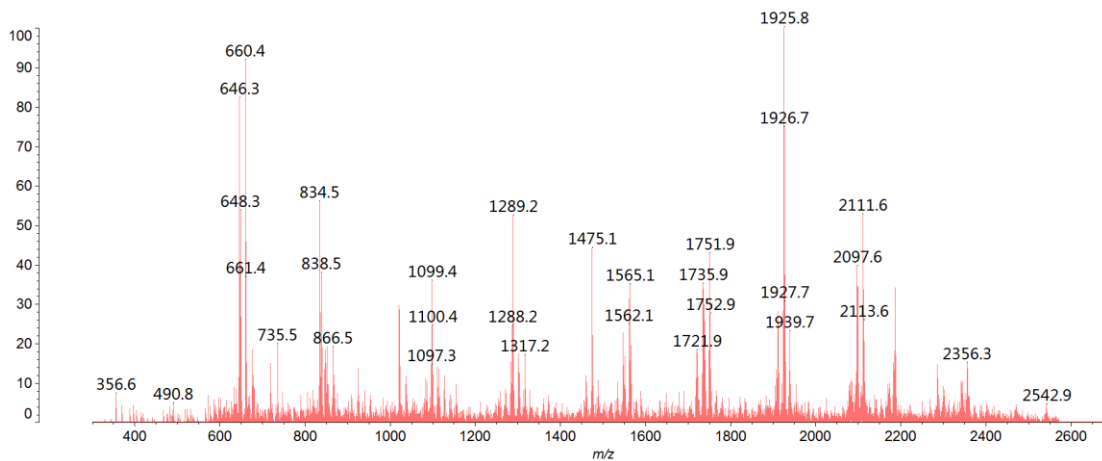

Figure S31, MALDI-TOF/TOF fragment ion spectra of the parent ions at m/z 2562

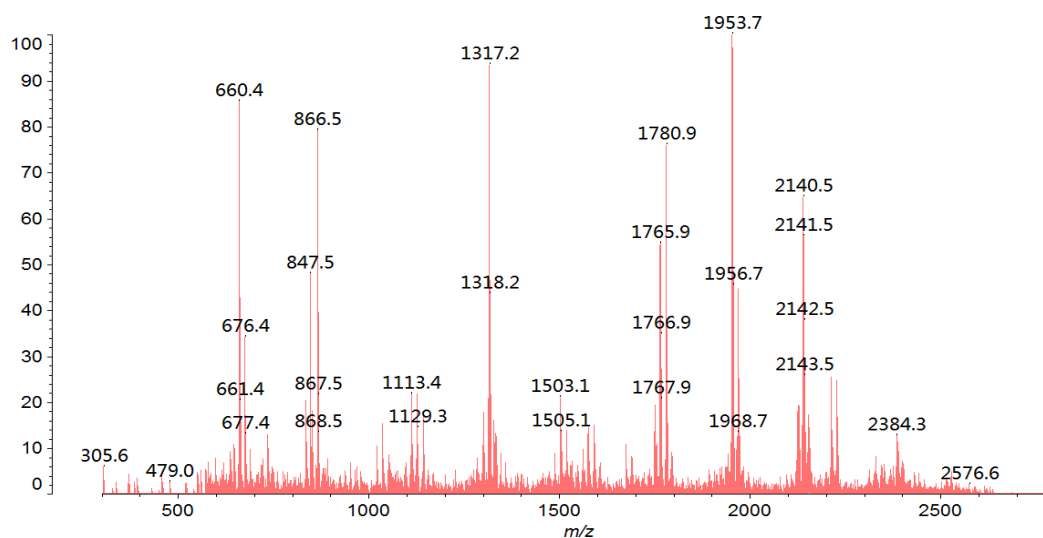

Figure S32, MALDI-TOF/TOF fragment ion spectra of the parent ions at m/z 2605

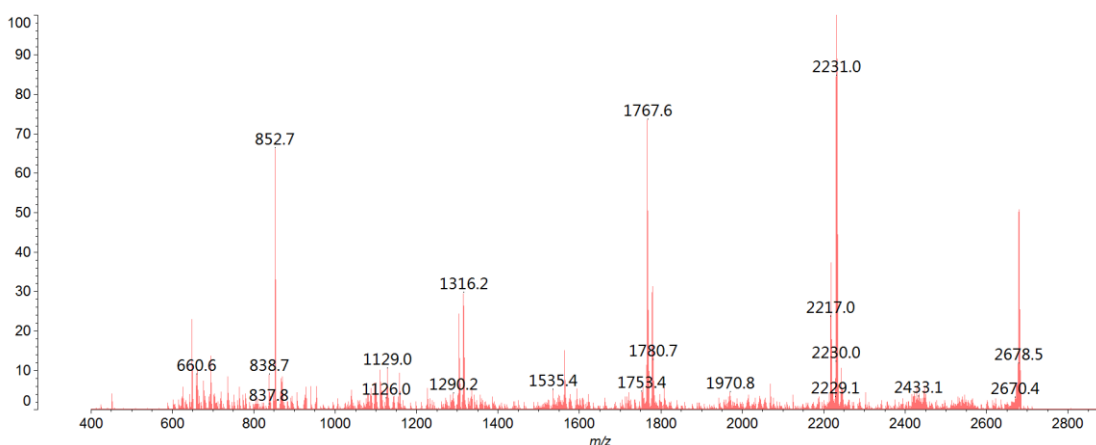

Figure S33, MALDI-TOF/TOF fragment ion spectra of the parent ions at m/z 2693

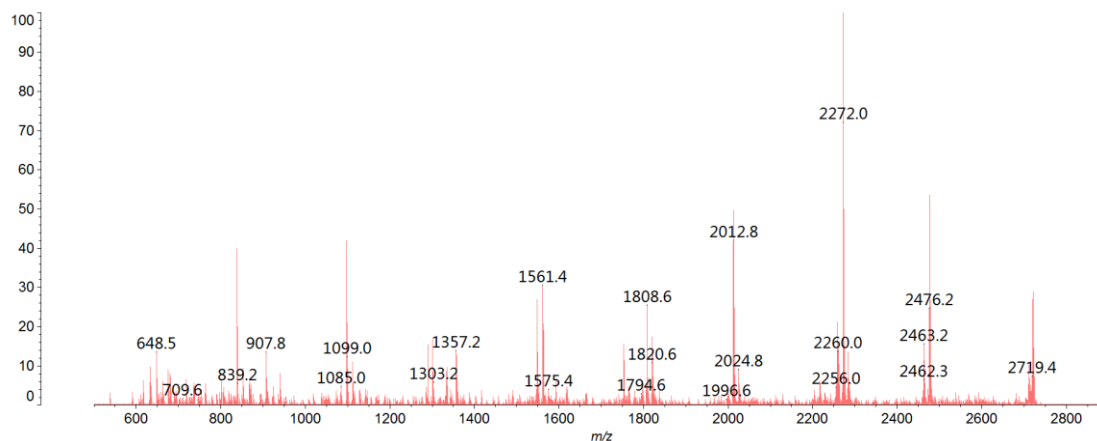

Figure S34, MALDI-TOF/TOF fragment ion spectra of the parent ions at  $m/z$  2734

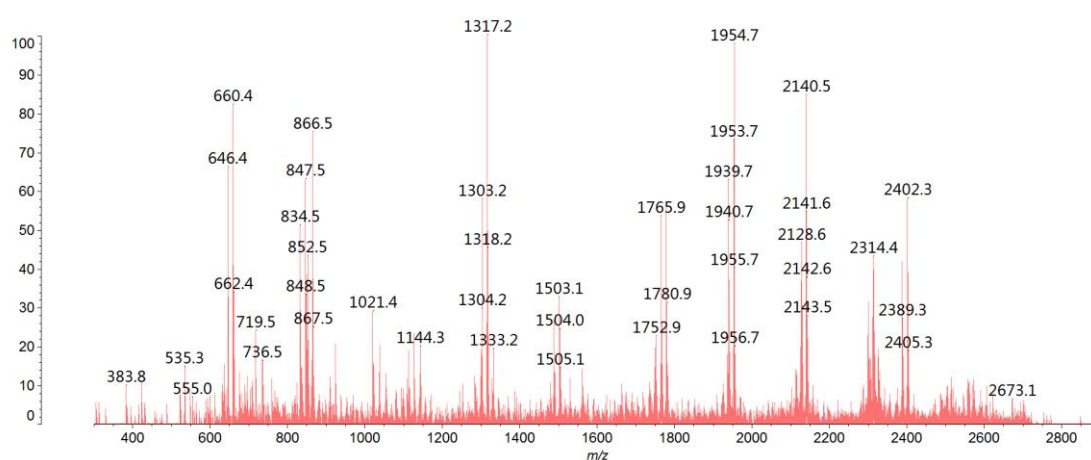

Figure S35, MALDI-TOF/TOF fragment ion spectra of the parent ions at  $m/z$  2779

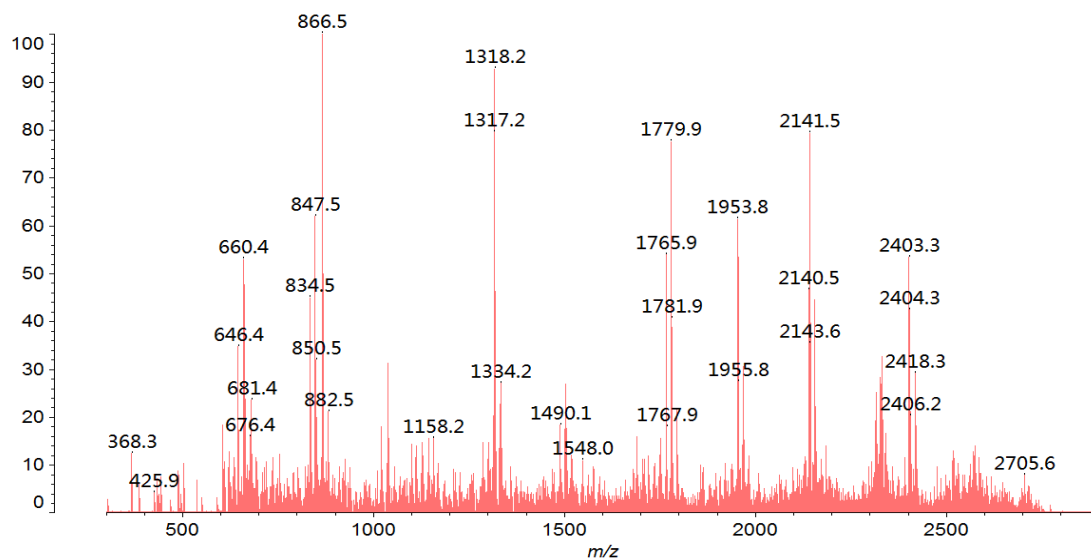

Figure S36, MALDI-TOF/TOF fragment ion spectra of the parent ions at  $m/z$  2792

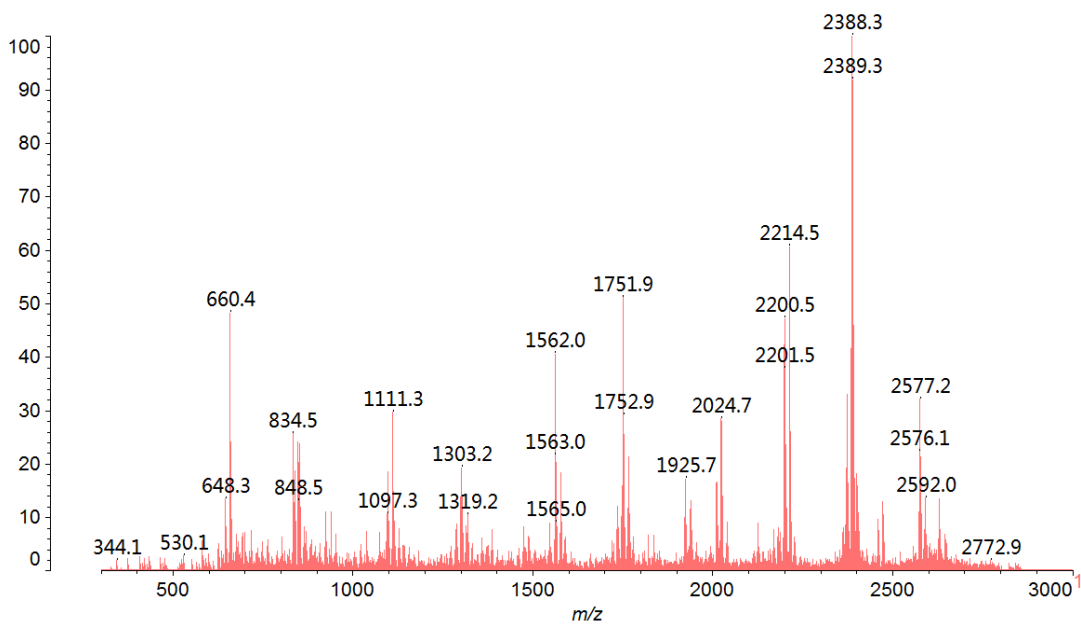

Figure S37, MALDI-TOF/TOF fragment ion spectra of the parent ions at  $m/z$  2850

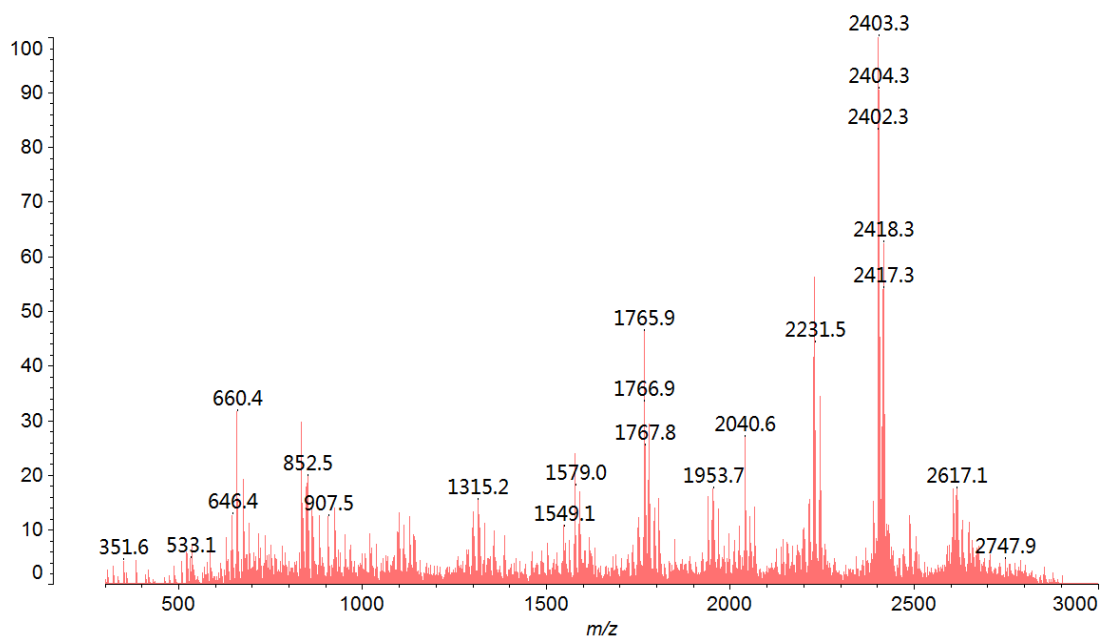

Figure S38, MALDI-TOF/TOF fragment ion spectra of the parent ions at  $m/z$  2880

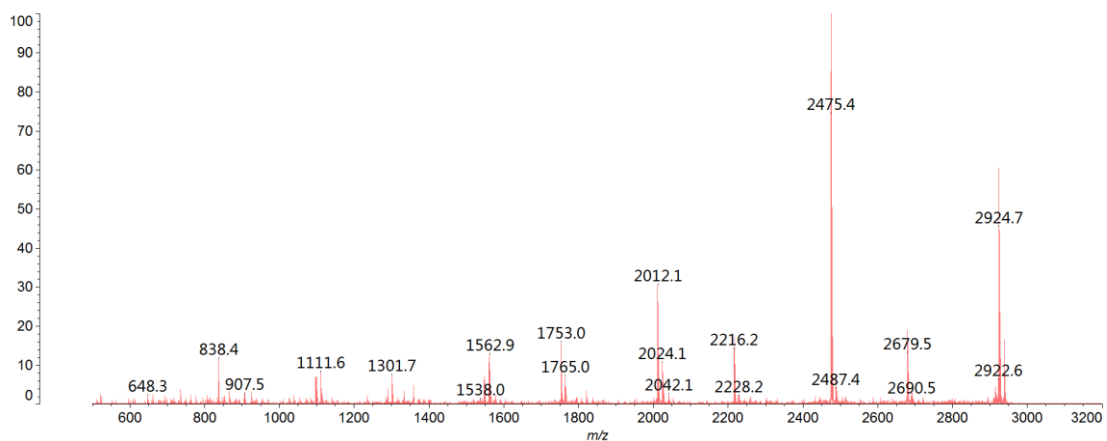

Figure S39, MALDI-TOF/TOF fragment ion spectra of the parent ions at m/z 2938

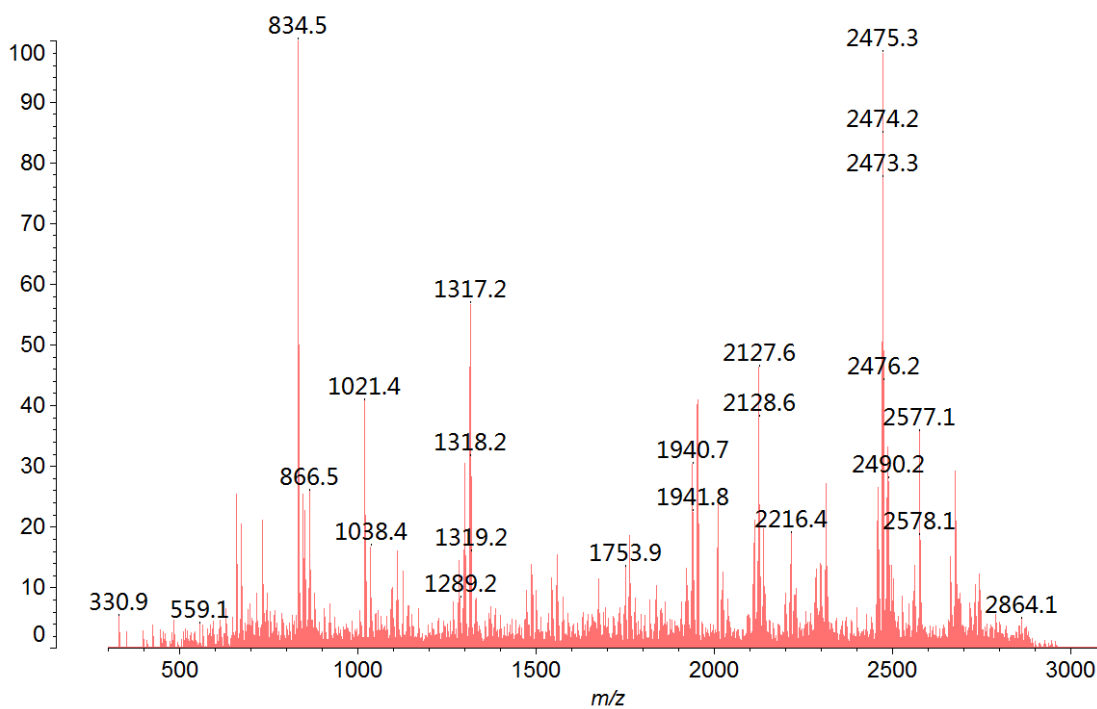

Figure S40, MALDI-TOF/TOF fragment ion spectra of the parent ions at m/z 2953

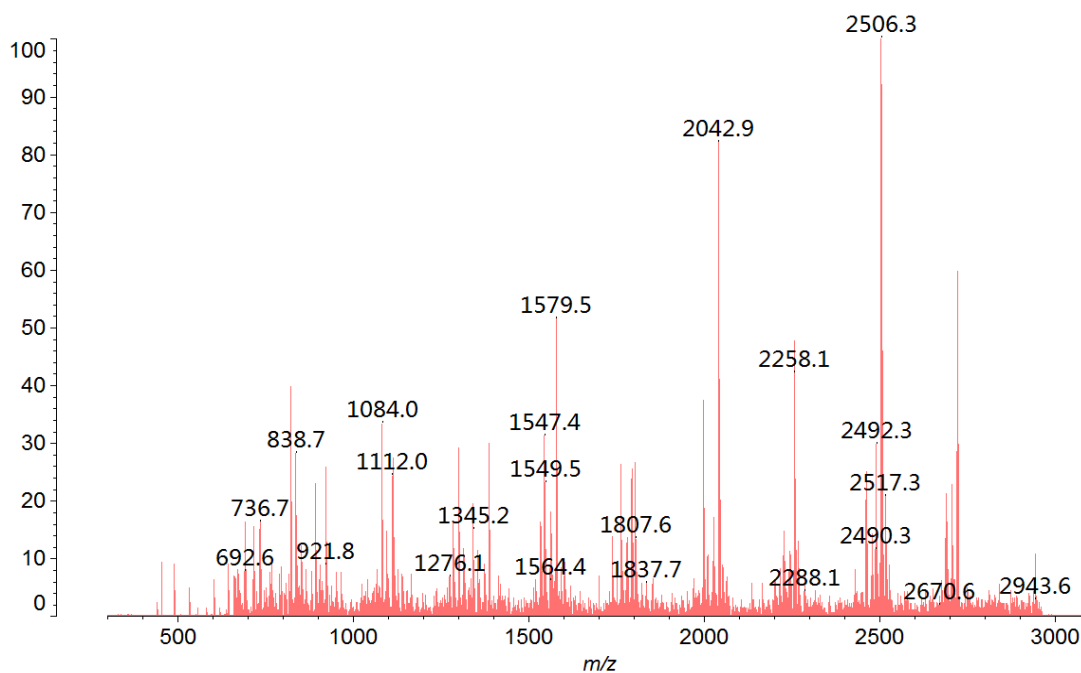

Figure S41, MALDI-TOF/TOF fragment ion spectra of the parent ions at m/z 2966

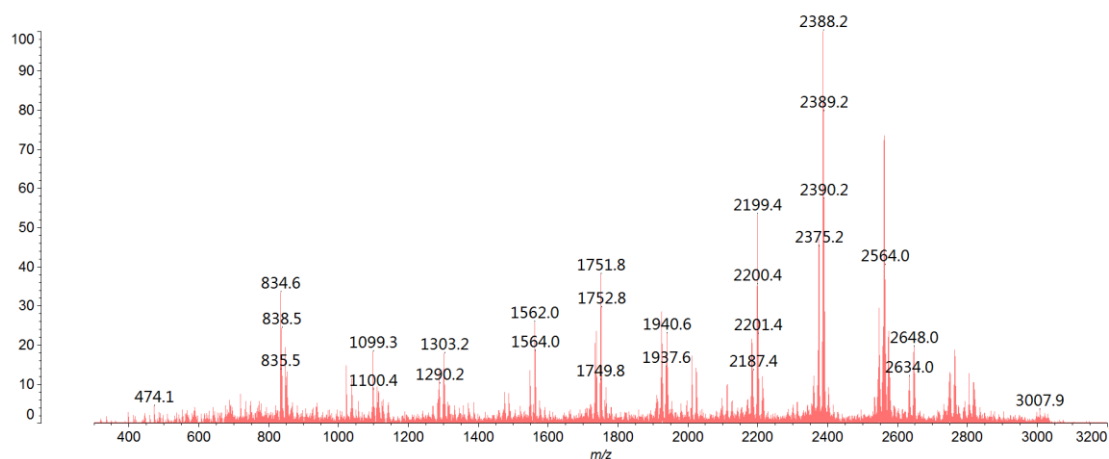

Figure S42, MALDI-TOF/TOF fragment ion spectra of the parent ions at m/z 3024

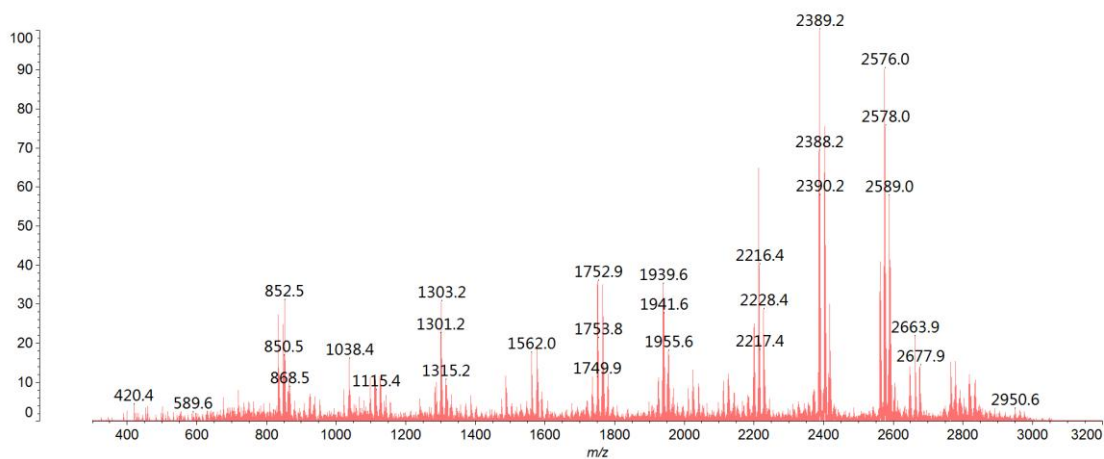

Figure S43, MALDI-TOF/TOF fragment ion spectra of the parent ions at m/z 3054



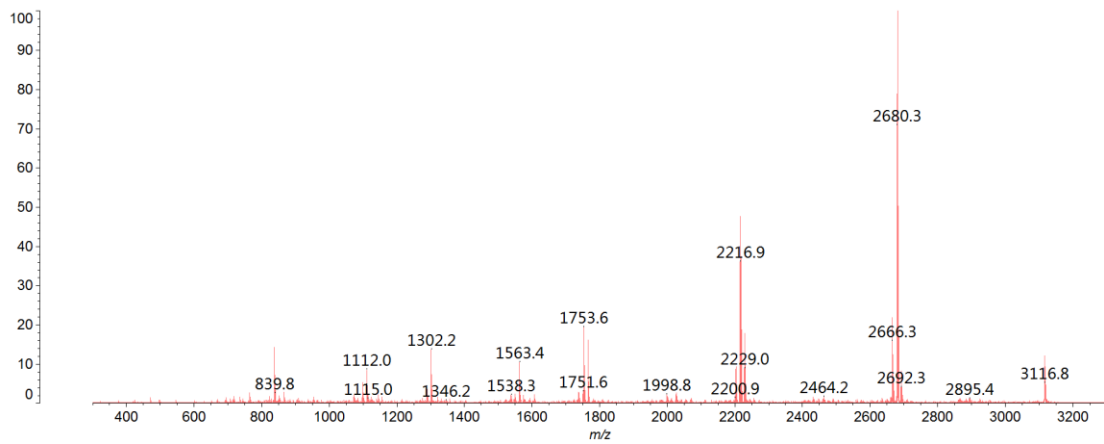

Figure S44, MALDI-TOF/TOF fragment ion spectra of the parent ions at  $m/z$  3142

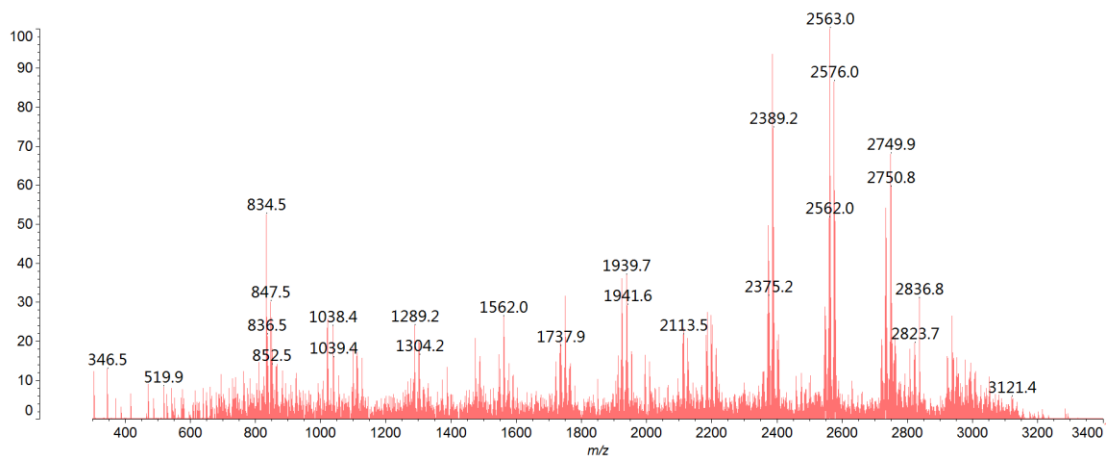

Figure S45, MALDI-TOF/TOF fragment ion spectra of the parent ions at  $m/z$  3211

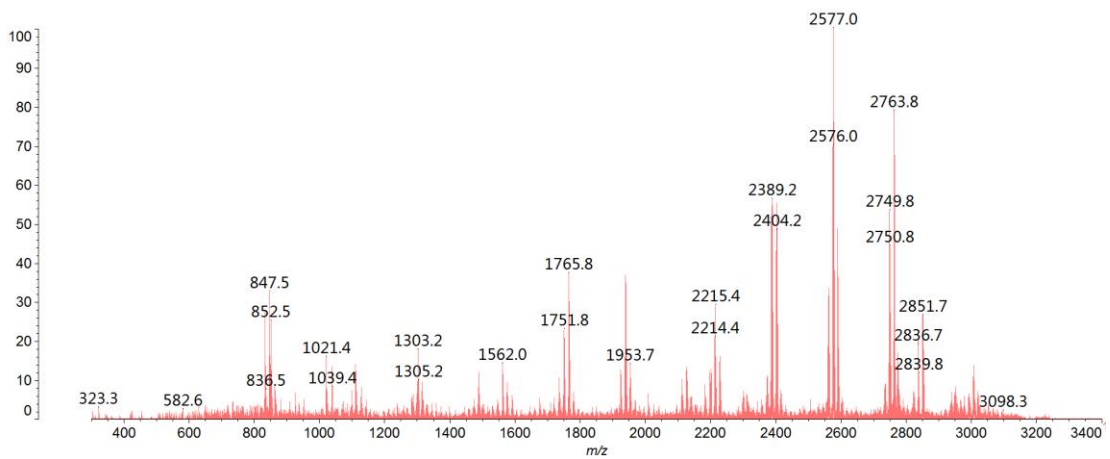

Figure S46, MALDI-TOF/TOF fragment ion spectra of the parent ions at  $m/z$  3228

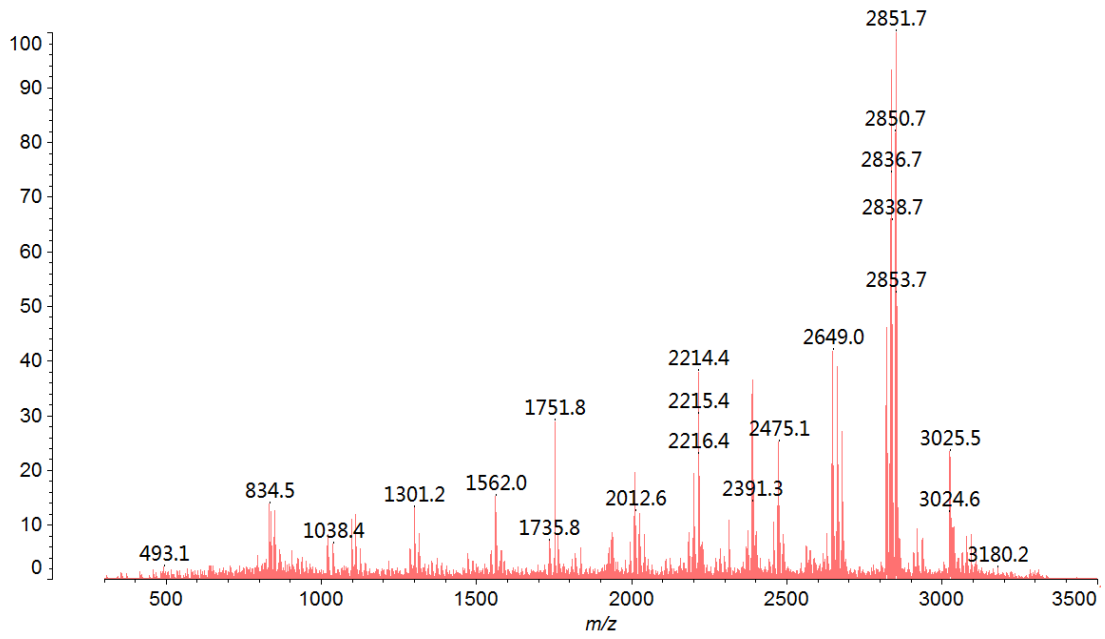

Figure S47, MALDI-TOF/TOF fragment ion spectra of the parent ions at m/z 3316

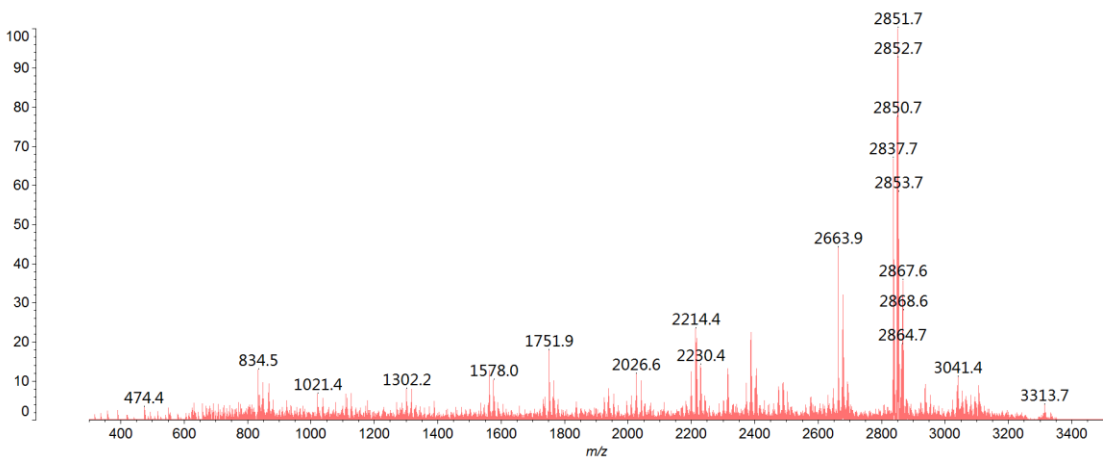

Figure S48, MALDI-TOF/TOF fragment ion spectra of the parent ions at m/z 3329

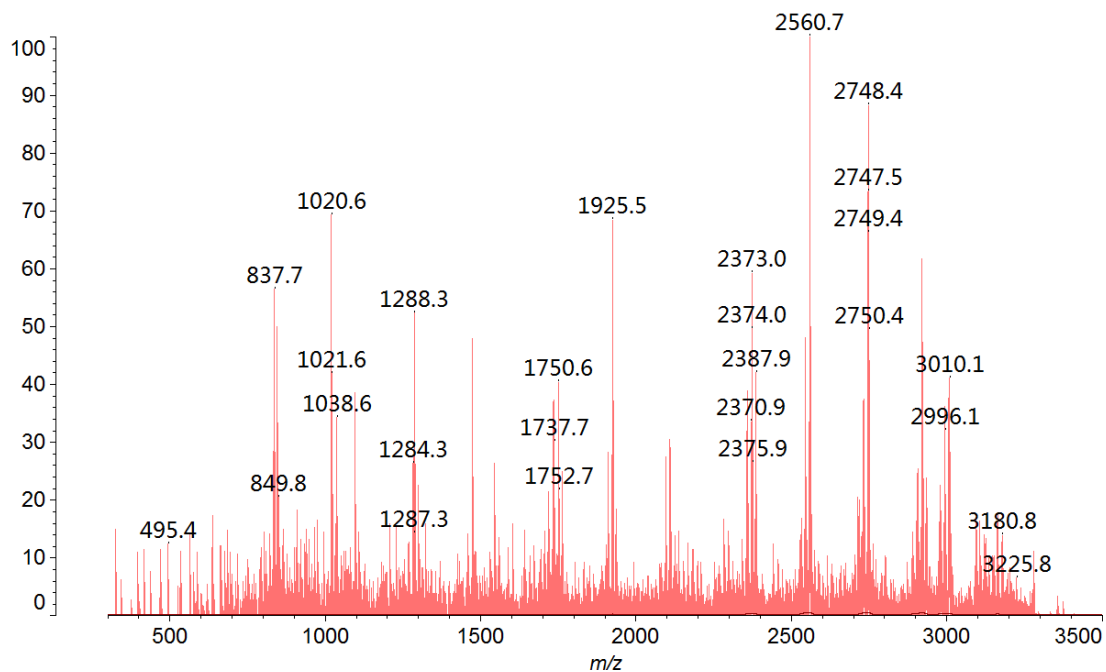

Figure S49, MALDI-TOF/TOF fragment ion spectra of the parent ions at  $m/z$  3387

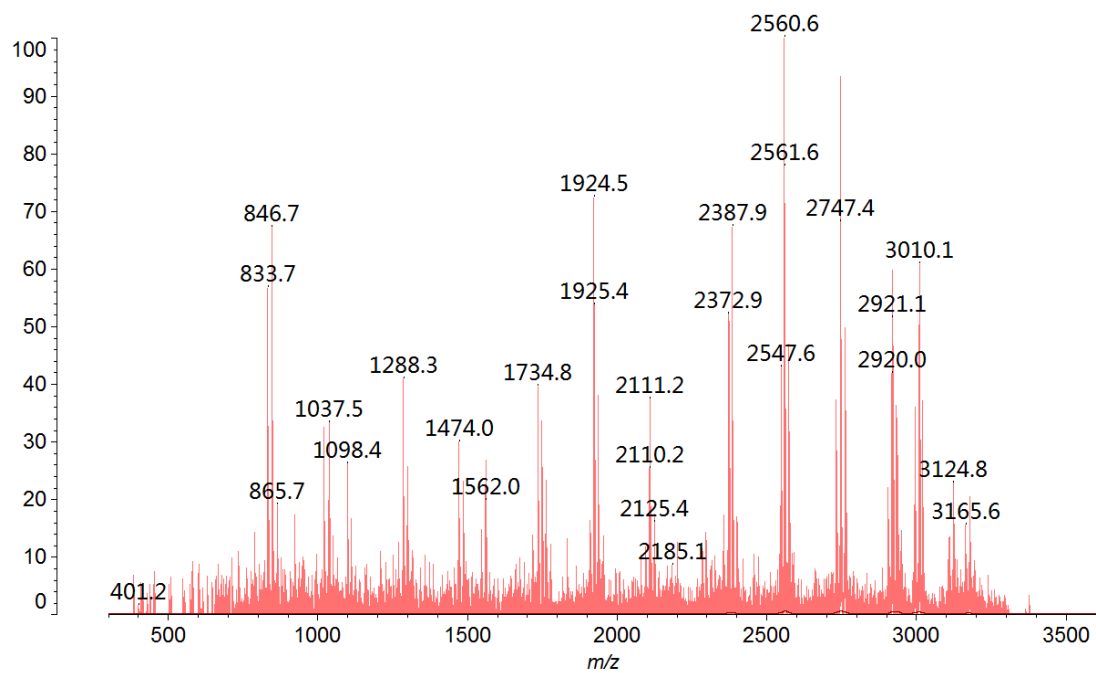

Figure S50, MALDI-TOF/TOF fragment ion spectra of the parent ions at  $m/z$  3402

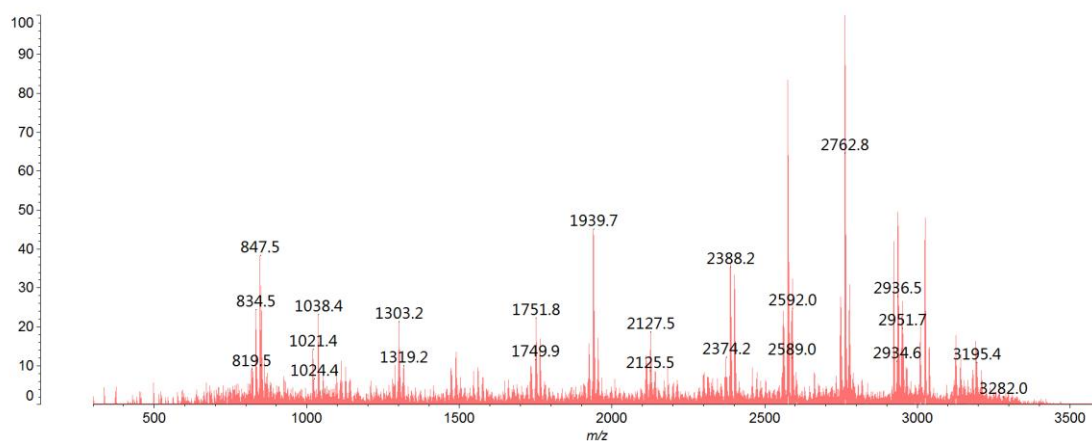

Figure S51, MALDI-TOF/TOF fragment ion spectra of the parent ions at m/z 3415

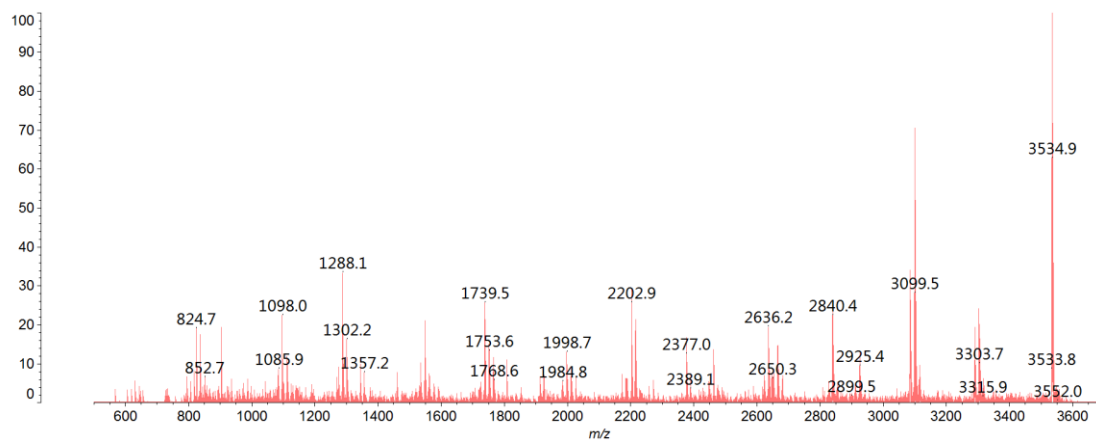

Figure S52, MALDI-TOF/TOF fragment ion spectra of the parent ions at m/z 3562

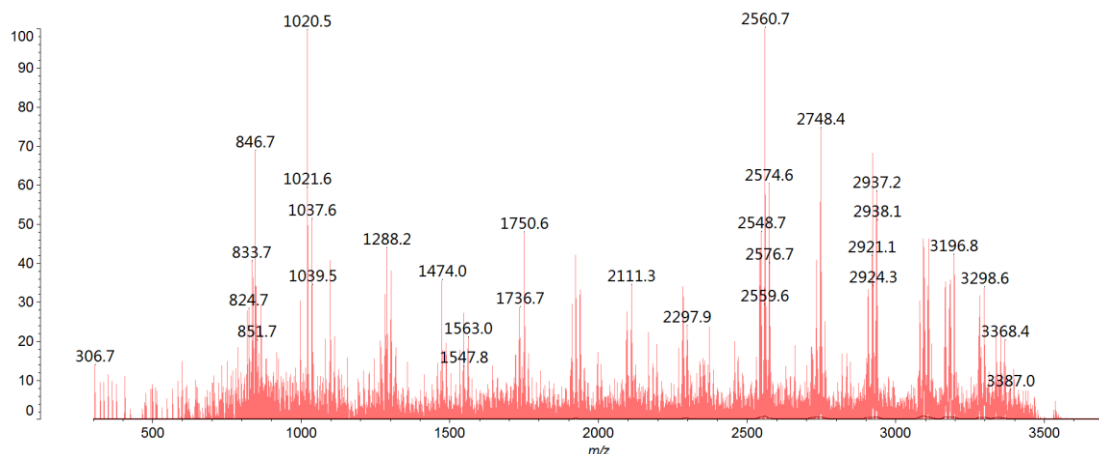

Figure S53, MALDI-TOF/TOF fragment ion spectra of the parent ions at  $m/z$  3576

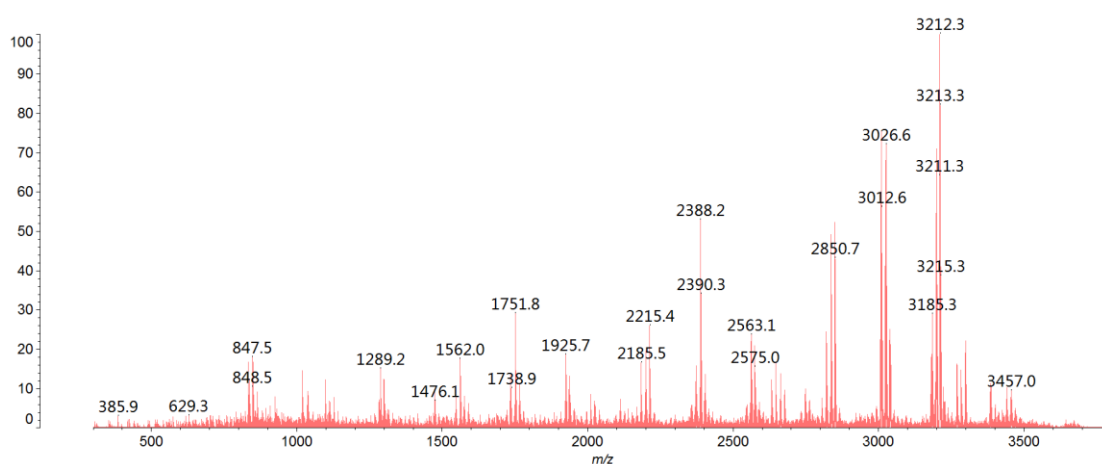

Figure S54, MALDI-TOF/TOF fragment ion spectra of the parent ions at  $m/z$  3677

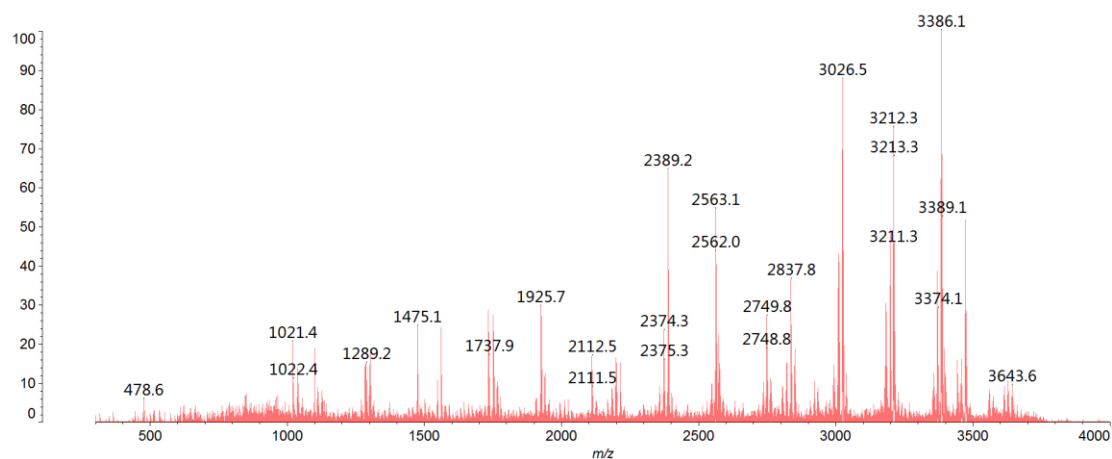

Figure S55, MALDI-TOF/TOF fragment ion spectra of the parent ions at  $m/z$  3851

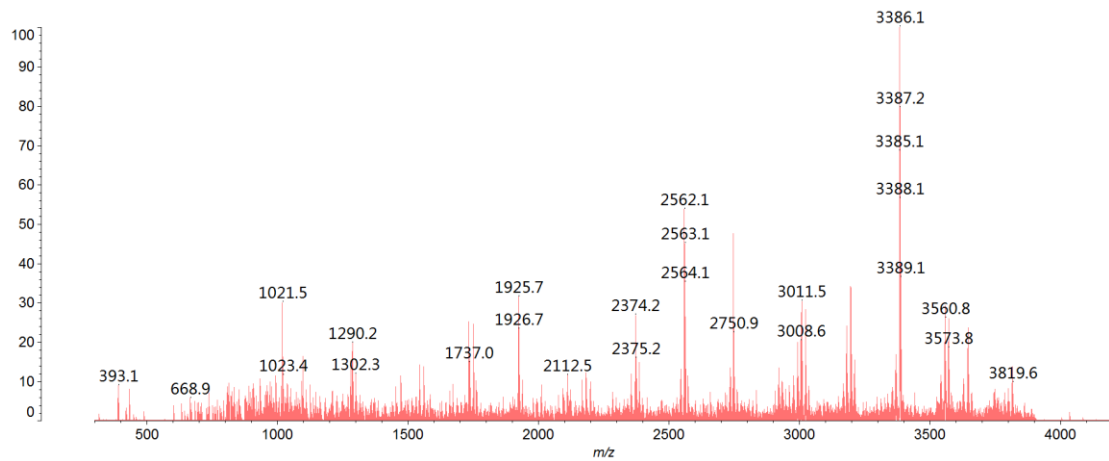

Figure S56, MALDI-TOF/TOF fragment ion spectra of the parent ions at m/z 4027

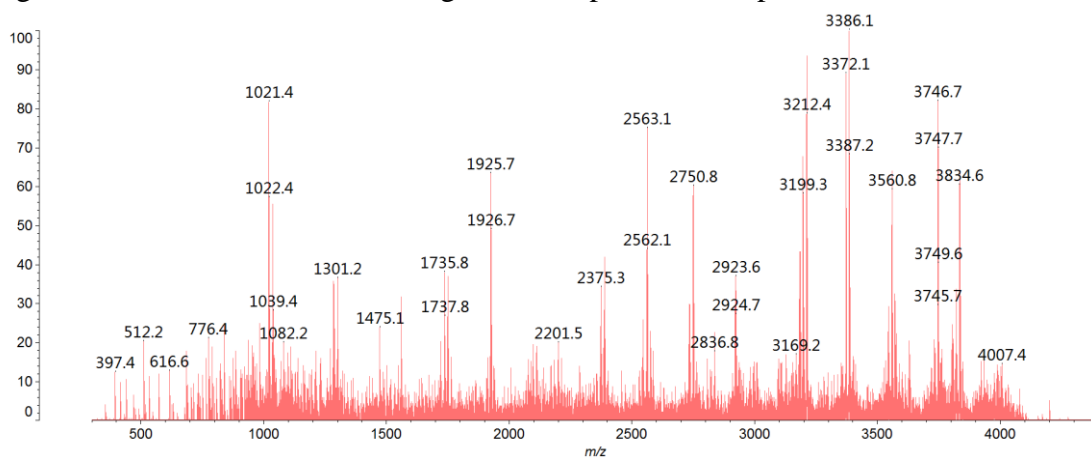

Figure S57, MALDI-TOF/TOF fragment ion spectra of the parent ions at m/z 4213

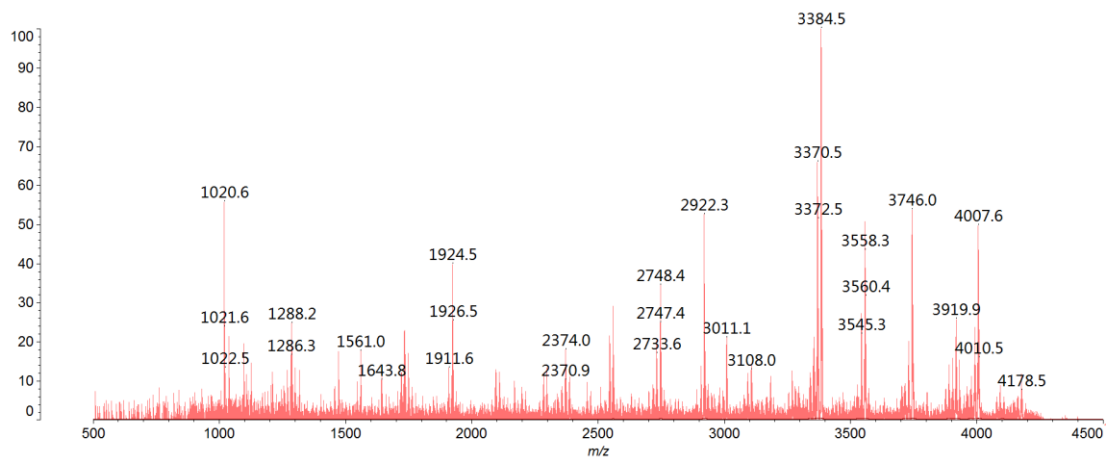

Figure S58, MALDI-TOF/TOF fragment ion spectra of the parent ions at m/z 4387

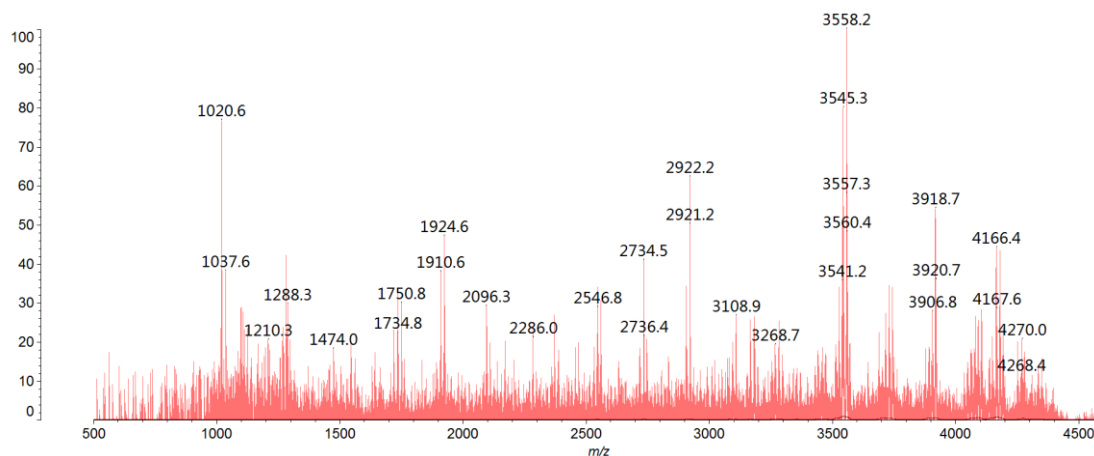

Figure S59, MALDI-TOF/TOF fragment ion spectra of the parent ions at m/z 4561

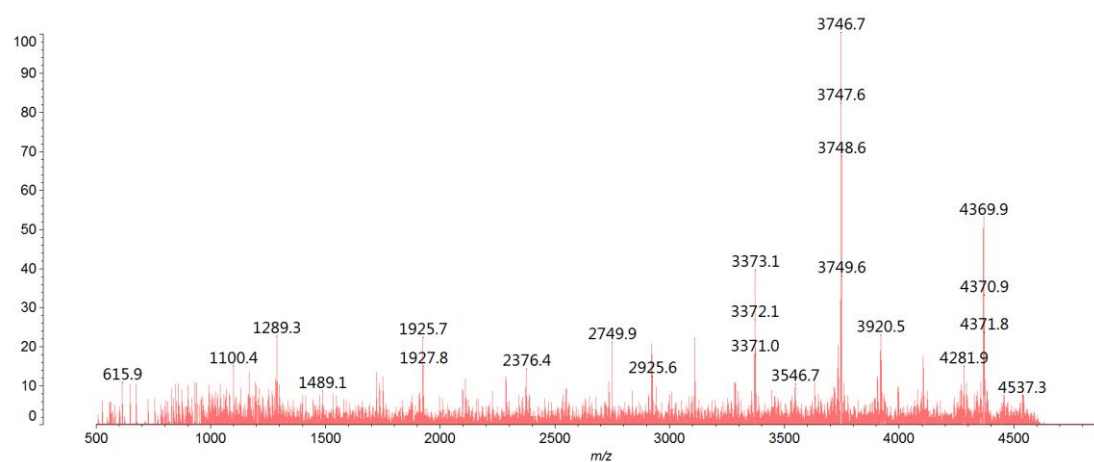

Figure S60, MALDI-TOF/TOF fragment ion spectra of the parent ions at m/z 4748

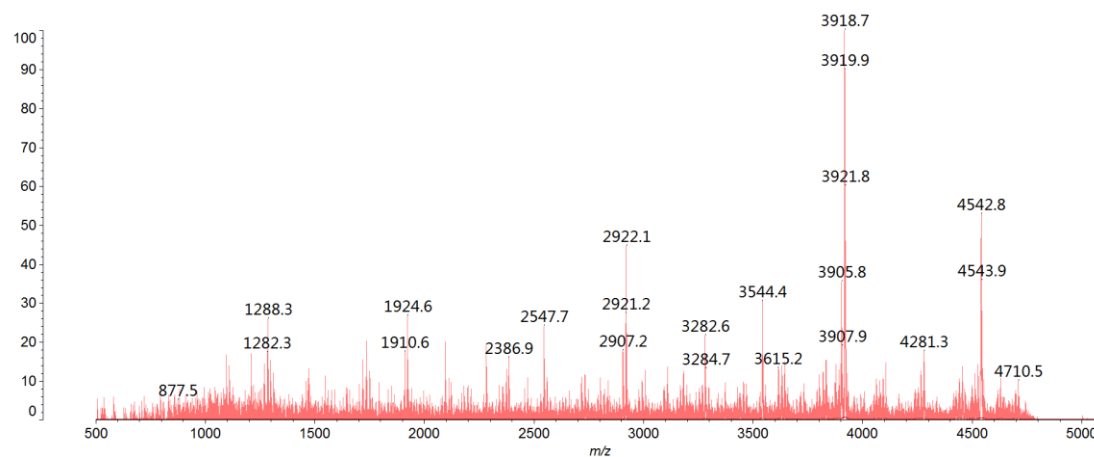

Figure S61, MALDI-TOF/TOF fragment ion spectra of the parent ions at m/z 4922
